# Supplementary material
Source: PubMed Central journal article supplement (PMC4457270)
Supplement: mmc2.pdf [file mmc2.pdf]

## Article

# Calcium Binding Promotes Conformational Flexibility of the Neuronal $\text{Ca}^{2+}$ Sensor Synaptotagmin

Maria Bykhovskaia<sup>1,2,\*</sup><sup>1</sup>Neuroscience Department, Universidad Central del Caribe, Bayamon, Puerto Rico; and <sup>2</sup>Department of Neurology, Wayne State University, Detroit, Michigan

**ABSTRACT** Synaptotagmin 1 (Syt1) is a synaptic vesicle protein that serves as a calcium sensor of neuronal secretion. It is established that calcium binding to Syt1 triggers vesicle fusion and release of neuronal transmitters, however, the dynamics of this process is not fully understood. To investigate how  $\text{Ca}^{2+}$  binding affects Syt1 conformational dynamics, we performed prolonged molecular dynamics (MD) simulations of  $\text{Ca}^{2+}$ -unbound and  $\text{Ca}^{2+}$ -bound forms of Syt1. MD simulations were performed at a microsecond scale and combined with Monte Carlo sampling. We found that in the absence of  $\text{Ca}^{2+}$  Syt1 structure in the solution is represented by an ensemble of conformational states with tightly coupled domains. To investigate the effect of  $\text{Ca}^{2+}$  binding, we used two different strategies to generate a molecular model of a  $\text{Ca}^{2+}$ -bound form of Syt1. First, we employed subsequent replacements of monovalent cations transiently captured within Syt1  $\text{Ca}^{2+}$ -binding pockets by  $\text{Ca}^{2+}$  ions. Second, we performed MD simulations of Syt1 at elevated  $\text{Ca}^{2+}$  levels. All the simulations produced Syt1 structures bound to four  $\text{Ca}^{2+}$  ions, two ions chelated at the binding pocket of each domain. MD simulations of the  $\text{Ca}^{2+}$ -bound form of Syt1 revealed that Syt1 conformational flexibility drastically increased upon  $\text{Ca}^{2+}$  binding. In the presence of  $\text{Ca}^{2+}$ , the separation between domains increased, and interdomain rotations became more frequent. These findings suggest that  $\text{Ca}^{2+}$  binding to Syt1 may induce major changes in the Syt1 conformational state, which in turn may initiate the fusion process.

## INTRODUCTION

Synaptic vesicle fusion is triggered by inflow of  $\text{Ca}^{2+}$  ions into nerve terminals. Synaptotagmin 1 (Syt1) serves as a calcium sensor that triggers rapid synchronous transmitter release in response to an action potential (1–5). Synaptic vesicles undergo a number of preparatory steps for exocytosis, including docking to the plasma membrane mediated by the specialized protein complex termed SNARE (reviewed in (6,7)). Syt1 is thought to interact with the SNARE complex, penetrate into the membrane bilayer, and trigger pore opening (reviewed in (8)). In addition, Syt1 has been implicated in bridging neuronal and vesicle membrane bilayers before the SNARE assembly ((9–11), but see (12)). Although Syt1 structure, dynamics, and  $\text{Ca}^{2+}$ -binding properties have been extensively studied, it is not yet fully understood how specifically Syt1 triggers fusion.

Syt1 comprises two  $\text{Ca}^{2+}$ -binding domains, C2A and C2B, which are attached to the synaptic vesicle by a transmembrane helix (13). Each domain has two loops forming a  $\text{Ca}^{2+}$ -binding pocket where  $\text{Ca}^{2+}$  ions are chelated by several aspartic acids (14,15).  $\text{Ca}^{2+}$  binding to the C2B domain is critical for synchronous transmitter release (16–18), whereas  $\text{Ca}^{2+}$  binding to the C2A domain may play a regulatory role in the coordination of synchronous and asynchronous release components (19–21).

Although it is clear that Syt1 physiological function critically depends on  $\text{Ca}^{2+}$  binding and the configuration of C2 domains, these aspects are not yet fully understood. Thus, it was shown that the isolated C2A domain binds three  $\text{Ca}^{2+}$  ions (14), whereas the isolated C2B domain binds two  $\text{Ca}^{2+}$  ions (15). However, a titration calorimetry study (22) suggested that the C2AB fragment of Syt1 has only four  $\text{Ca}^{2+}$ -binding sites. Furthermore, a crystallography study of the C2AB fragment of Syt1 (23) revealed a perpendicular orientation and tight coupling of C2 domains where  $\text{Ca}^{2+}$ -binding loops of C2A domain interacted with C2B domain. The latter findings suggest a possibility that  $\text{Ca}^{2+}$  binding can cooperate between C2 domains and that  $\text{Ca}^{2+}$ -binding properties of isolated domains may not fully account for the kinetics and stoichiometry of  $\text{Ca}^{2+}$  binding of Syt1 in vivo.

It is still a matter of debate whether Syt1 function depends on the cooperation of C2 domains and whether the domains are coupled. The crystallography study (23) showed that C2 domains are tightly packaged and interact, however, optical studies suggest that in the solution Syt1 exists as an ensemble of conformers (24) and that C2 domains may be flexibly linked and may not interact (25,26). On the other hand, functional studies showed that C2A domain influences the membrane penetration of C2B domain (27,28) and that mutating the linker connecting C2 domains markedly affects the Syt1 function (29). Thus, a synergistic action of C2 domains is likely (30).

Submitted January 7, 2015, and accepted for publication April 9, 2015.

\*Correspondence: mb.ucdelcaribe@gmail.com

Editor: Scott Feller.

© 2015 by the Biophysical Society  
0006-3495/15/05/2507/14 \$2.00

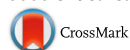

Rapid synchronous exocytosis occurs at a submillisecond scale, with a delay between  $\text{Ca}^{2+}$  entry and the onset of post-synaptic response being on the order of 150–200  $\mu\text{s}$  (31,32), and a major part of this time is probably occupied by the fusion pore dilation and the diffusion of the transmitter across the synaptic cleft (33). Thus, it is likely that the protein fusion machinery acts at a scale of several microseconds or possibly tens of microseconds. Although an experimental detection of protein conformational transitions at a microsecond timescale may not be currently feasible, computational methods, such as molecular dynamics (MD), could provide valuable insights. In this study, we performed the first, to our knowledge, all-atom MD simulations of the Syt1 C2AB fragment at a microsecond timescale with the goal to investigate the ensemble of its conformational states in the presence and in the absence of  $\text{Ca}^{2+}$ .

## MATERIALS AND METHODS

### Monte Carlo minimization

The Monte-Carlo minimization (MCM) approach (34) with the ZMM/MVM software package (<http://www.zmmsoft.com>, (35)) was employed for the initial optimization of Syt1 structure and for the generation of additional conformational states. Unless stated otherwise, MCM computations were performed in the space of all the torsion and bond angles of a molecule without restraints. Distance-dependent electrostatic potential was used to implicitly simulate water environment.

### System setup

2R83 structure (23) was used for an initial approximation of Syt1 conformation. This structure was initially optimized employing MCM. The optimized structure was placed in a water box ( $100 \times 100 \times 100 \text{ \AA}$ ) constructed using Visual Molecular Dynamics Software (VMD, Theoretical and Computational Biophysics Group, NIH Center for Macromolecular Modeling and Bioinformatics, at the Beckman Institute, University of Illinois at Urbana-Champaign, IL). Potassium and chloride ions were added to neutralize the system and to yield 150 mM concentration of KCl.

A Syt1 conformation with a stretched linker was obtained by applying harmonic distance constraints and performing MCM optimization with ZMM software. The constraints were applied to the residues R199 of the C2A domain and D392 of the C2B domain. All the internal variables of the Syt1 molecule, including bond lengths, bond angles, and torsion angles were kept rigid, with the exception of the backbone torsion angles of the linker residues 266–273. This approach allowed us to derive the Syt1 conformation where domain structure remained identical to that obtained by crystallography but C2 domains were separated and did not interact.

An additional set of conformations with modified domain arrangement was obtained by Monte Carlo (MC) sampling of all the linker backbone torsions (residues 266–273). The structures with overlapping atoms were rejected, and the remaining structures were optimized by MCM. All the obtained structures were placed in water boxes with ions added, as described previously.

### MD

MD production runs were performed at Anton supercomputer (36) with Desmond software through the MMBioS (University of Pittsburgh, Pittsburgh, PA; National Center for Multiscale Modeling of Biological Systems; Pittsburg Supercomputing Center, Pittsburgh, PA; and D. E. Shaw Research Institute, New York, NY). The initial equilibration (100–200 ns) was performed employing NAMD scalable molecular dynamics (37) (Theoretical and Computational Biophysics Group, NIH Center for Macromolecular

Modeling and Bioinformatics, at the Beckman Institute, University of Illinois at Urbana-Champaign) at XSEDE (Extreme Science and Engineering Discovery Environment) Stampede cluster (TACC). Both NAMD and Desmond simulations were performed employing CHARMM22 force field (38) with periodic boundary conditions and Ewald electrostatics in isothermal-isobaric ensemble at 300 K with a time step of 2 fs.

### Analysis and visualization

The trajectory analysis was performed employing VMD and Vega ZZ (Drug Design Laboratory, University of Milan, Milan, Italy) software; PyMOL software was used for visualization, molecular graphics, and illustrations. Quantitative analysis was performed using MATLAB (The MathWorks, Natick, MA). In production runs, the time-step between trajectory points was 240 ps.

Syt1 conformations were classified by interdomain rotation torsion and bending plain angles (Fig. 1 A). The torsion angle was defined by  $\text{C}_\alpha$  atoms of the residues G305-E350-N154-M173. The value of  $0^\circ$  or  $360^\circ$  for the interdomain rotation torsion corresponds to  $\text{Ca}^{2+}$ -binding pockets (residues G305 and M173) facing the same surface, whereas the angle of  $180^\circ$  corresponded to  $\text{Ca}^{2+}$ -binding pockets facing opposing surfaces. The bending angle was defined by  $\text{C}_\alpha$  atoms of the residues M173-L273-G305. This corresponded to the plain angle connecting  $\text{Ca}^{2+}$ -binding pockets (M173 and G305) with the linker (L273).

Conformational energy was computed as a sum of the energy of the protein and the energy of nonbonded interactions of the protein with water molecules and ions.

To describe the domain separation, we used the value of the gyration radius, defined as the root mean-square distance of all the backbone atoms from their center of mass. Interdomain van der Waals energy was used as an additional measure of domain separation and coupling, and it was computed between the residues 140–265 (C2A domain) and the residues 273–418 (C2B domain).

## RESULTS

### In the absence of $\text{Ca}^{2+}$ , Syt1 exists as an ensemble of conformations with tightly interacting domains

First, we investigated the stability of Syt1 structure obtained by crystallography (23). We performed a prolonged (3.3  $\mu\text{s}$ ) MD simulation of the Syt1 molecule in a water/ion environment starting from the optimized 2R83 x-ray structure (trajectory R0, Table 1). To analyze interdomain configuration along the trajectory, we calculated the torsion angle corresponding to interdomain rotation, the plane angle corresponding to relative bending of the domains against the middle of the linker (Fig. 1 A), and the gyration radius, reflecting the separation of the domains.

We found that Syt1 interdomain configuration remained stable for  $\sim 1.1 \mu\text{s}$  (Fig. 1, B–D, state 0), although minor fluctuations of the interdomain torsion and bending angles, as well as of the gyration radius were observed within this period. Subsequently, a conformational transition occurred (Fig. 1, B–D, state 1), the domains separated (note a transient increase in the gyration radius around 1.2  $\mu\text{s}$ , Fig. 1 B), and the structure transitioned into a different state (Fig. 1, B–D, state 2). State 2 had tightly interacting domains (Fig. 1 C) and C2A domain was rotated against C2B domain by  $\sim 60^\circ$ . This conformation remained stable for the remaining 1.5  $\mu\text{s}$  of the simulation, without

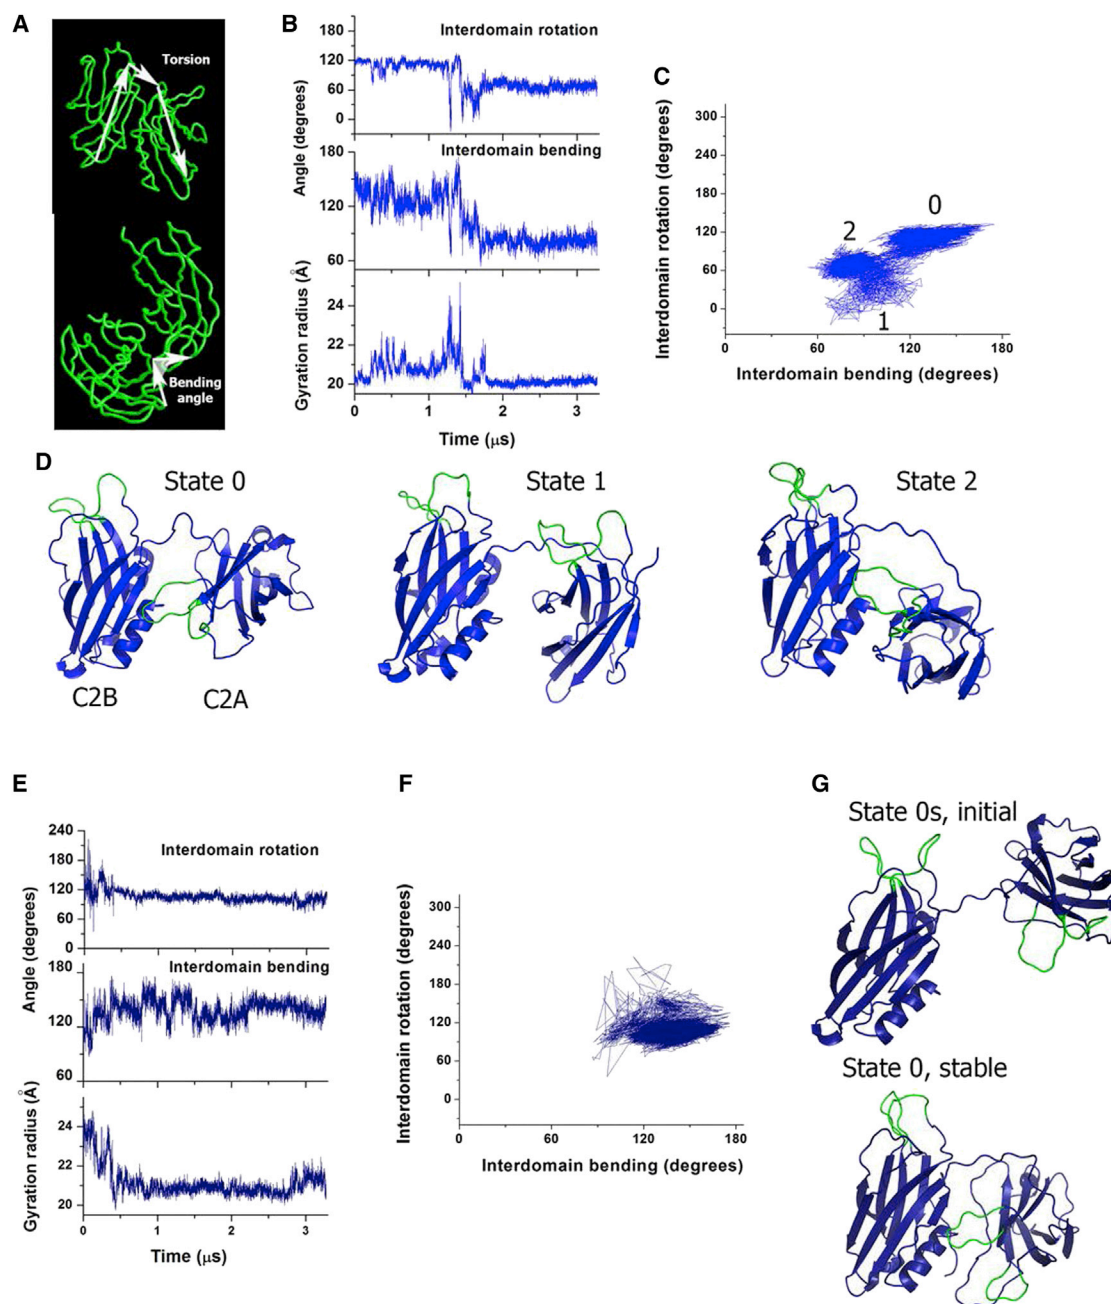

FIGURE 1 Syt1 conformational state obtained by crystallography is relatively stable in a water/ion environment, however interdomain rearrangements can occur at a microsecond scale. (A) Interdomain rotation torsion (*top*) and bending plain (*bottom*) angles defining configuration of C2 domains. (B) MD trajectory started from the conformation obtained by crystallography. (C) The same trajectory presented in the space defined by bending and rotation. The initial state 0, a transitional state 1, and a final stable state 2 are labeled. (D) Structures corresponding to the states 0, 1, 2 are shown. Ca<sup>2+</sup>-binding loops are colored green. All the structures are shown with a similar orientation of the C2B domain. (E) MD trajectory started from the stretched state 0s. (F) The same trajectory presented in the space of bending and rotation. (G) The initial state 0s and the final stable state with tightly coupled domains (*bottom*, state 0). To see this figure in color, go online.

significant fluctuations in either gyration radius or interdomain torsion and bending angles (Fig. 1 B, the interval between 1.8 and 3.3  $\mu$ s).

This result suggests that Syt1 conformation obtained by crystallography is relatively stable in the solution, but at a microsecond timescale C2 domains can undergo rear-

rangements. To further test this idea and to ensure that the structure is not trapped in a local energy minimum, we performed MD simulations of Syt1 starting from a conformation with a stretched linker (run R0s, Table 1, Fig. 1, E–G). After an initial period of instability ( $\sim 0.5 \mu$ s, Fig. 1 E), where considerable interdomain rotation and

**TABLE 1** Summary of MD simulations

| MD Trajectory                       | Simulation Time ( $\mu$ s) | Initial State                        | Final State | Figure   |
|-------------------------------------|----------------------------|--------------------------------------|-------------|----------|
| <b>Ca<sup>2+</sup> unbound Syt1</b> |                            |                                      |             |          |
| R0                                  | 3.3                        | optimized x-ray, State 0             | CS4         | 1 B–D    |
| R0s                                 | 3.3                        | stretched x-ray, state 0s            | CS1         | 1 E–G    |
| R1                                  | 3.3                        | MC, state 1                          | CS2         | 2 B      |
| R2                                  | 3.3                        | MC, state 2                          | CS1         | 2 B      |
| R3                                  | 3.3                        | MC, state 3                          | CS3         | 2 B      |
| <b>Ca<sup>2+</sup>-bound Syt1</b>   |                            |                                      |             |          |
| R4Ca                                | 5.5                        | state 0 bound to 4 Ca <sup>2+</sup>  |             | 4, 5, S7 |
| RHCa1                               | 3.3                        | state 0 at elevated Ca <sup>2+</sup> |             | S5, A–C  |
| RHCa2                               | 3.3                        | state 1 at elevated Ca <sup>2+</sup> |             | S5, D–F  |
| R5Ca                                | 0.25                       | state 0 bound to 5 Ca <sup>2+</sup>  |             | S6       |

bending was observed, the domains came close together (note a decrease in the gyration radius, Fig. 1 E), and the structure stabilized (Fig. 1 G, bottom, final stable state). No major interdomain rotation or bending occurred within this run, with the exception of relatively brief and transient change in the bending and rotation angles within the initial 0.5  $\mu$ s of the trajectory (Fig. 1 E). This result provides further evidence that the conformation with tightly interacting and perpendicularly oriented domains (state 0, Fig. 1, D and G) is fairly stable in the solution. However, the conformational transition observed during the first run (Fig. 1, B–D), suggests that Syt1 may adopt different conformations in a physiological environment, and that an ensemble of Syt1 conformational states may coexist in the solution.

To test this possibility, we generated a new, to our knowledge, set of Syt1 conformations employing MC sampling of the linker backbone torsions. States 0 and 0s were used to generate this new, to our knowledge, set of Syt1 initial states. For each of the states 0 and 0s, backbone torsion angles of the linker (residues 266–273) were sampled randomly to generate 100 different Syt1 topologies, and thus, a total of 200 Syt1 topologies were generated. Subsequently, conformations with overlapping atoms were rejected. This procedure produced 16 different Syt1 conformations (Fig. S1 in the Supporting Material), which were used as initial states for MCM optimization. After the optimization, nine conformations (Fig. S2; Fig. 2 A) fell within a relatively low energy range (50 kcal/mol, Fig. 2 A), although others had significantly higher energies (over 100 kcal/mol). The optimized low energy states had tightly interacting C2 domains (Fig. S2), with only one exception (state 7, Fig. S2). Three of these conformations (1–3, Fig. S2) were used as initial states for subsequent MD runs (Fig. 2 B; Table 1, trajectories R1–R3). These states were chosen with the goal to broadly sample the permissive conformational space (Fig. 2 A) of Syt1.

The states 1 and 2 underwent major conformational transitions in the beginning of MD trajectories R1 and R2, respectively (within the initial 0.3  $\mu$ s of the simulation,

see Fig. 3 C, red and cyan; note an increase in the gyration radius and a change in the interdomain torsion angle, indicating a separation between the domains and their rotation). In the state 3 (see Fig. 3 C, magenta), the separation between the domains in the beginning of the trajectory R3 occurred as well (note a transient increase in the gyration radius and fluctuations in the torsion angle between 0.1 and 0.2  $\mu$ s), however, the domains did not rotate, the gyration radius decreased, and the conformation stabilized. The three runs R1–R3 (Table 1) are summarized in Fig. 3 D, showing major conformational transitions during the runs R1 and R2 (red and cyan).

Thus, we performed a total of 16.5  $\mu$ s MD simulations starting from five different initial states (Figs. 1 and 2; Table 1). This allowed us to map the population density (Fig. 3 A) and to determine the ensemble of highly populated states (Fig. 3 B) of Syt1. All these conformational states (CS1–CS4, Fig. 3 B) had tightly coupled domains, and interdomain interactions in the states CS1, CS2, and CS4 were stabilized by contacts between Ca<sup>2+</sup>-binding loops of the C2A domain and C2B domain.

According to its C2 domain configuration, the conformation observed by crystallography belongs to the CS1 cluster. However, significant fluctuations in the bending angle and interdomain torsion were observed within this state (Fig. S3 A; also note the broad area occupied by the state CS1 in Fig. 3 A), and several CS1 substates could be distinguished (Fig. S3 B). In all the substates, interdomain interactions occurred between the C2A residues R233–F234 and either  $\beta$ 8 (I401–T406, Fig. S2 B.1) or  $\alpha$ 2 (G384–A395, Fig. S3 B.2) of the C2B domain. Furthermore, partial melting of the C2B  $\alpha$ 2 helix was observed along the trajectory, and the melted part formed tight links with the residue F234 (Fig. S3 B.3). In several points of the trajectory, the partially unstructured  $\alpha$ 2 helix came into contact with both Ca<sup>2+</sup>-binding loops of the C2A domain (Fig. S3 B.4). In addition, all the C1 substates were stabilized by an interaction of the polylysine motif K189–K192 of C2A domain and the poly-E motif E410–E412 of C2B domain (Fig. S3, B–E).

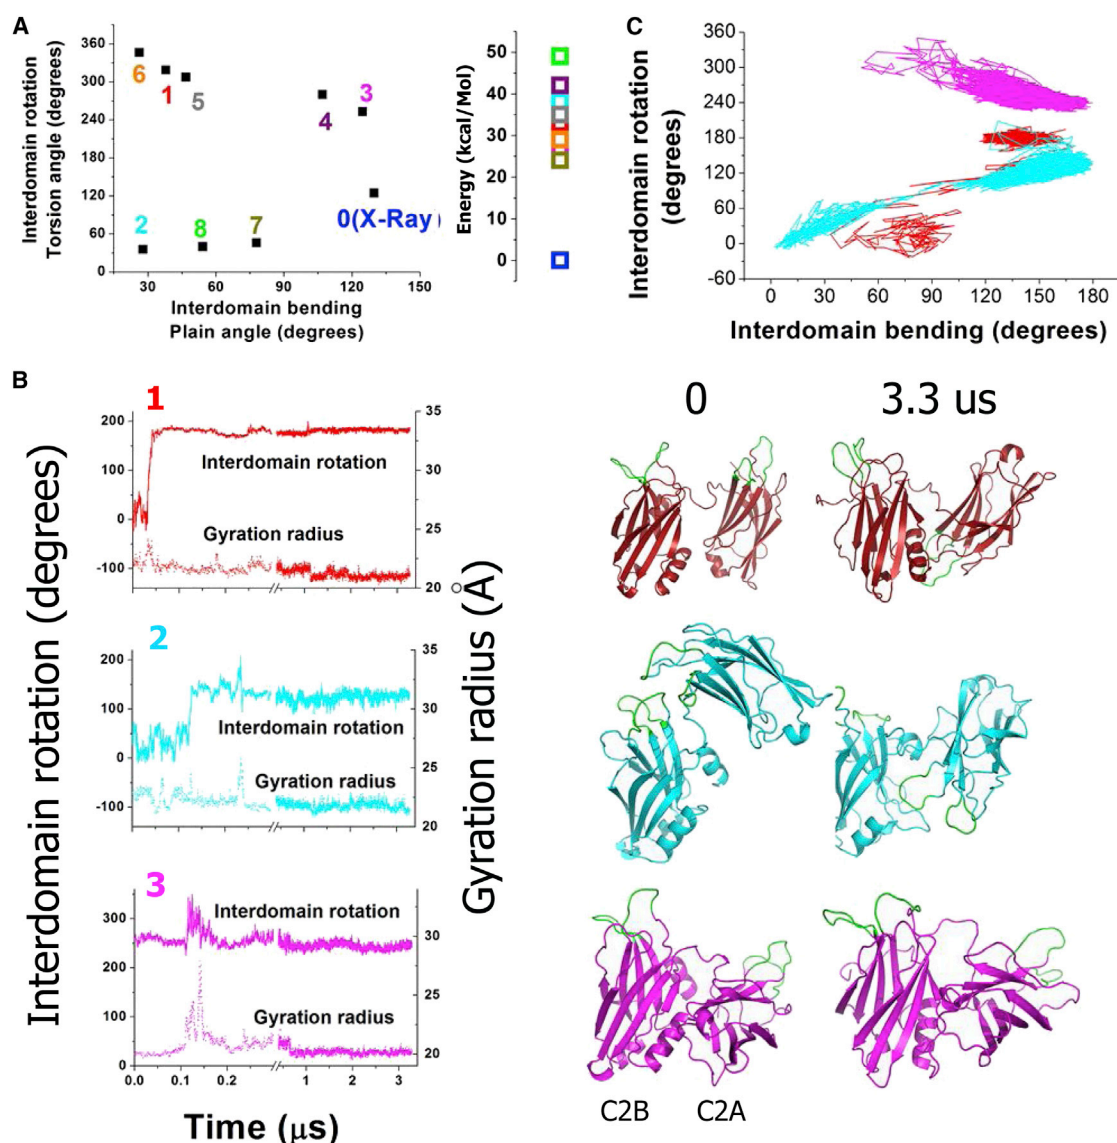

FIGURE 2 Conformational analysis of Ca<sup>2+</sup>-unbound form of Syt1 (A) Conformational states of Syt1 obtained by MC sampling, including their topologies (left) and energies (right). Energies are plotted in relation to the state obtained by crystallography (state 0, E = 0 kcal/mol). (B) MD trajectories started from MC states 1, 2, 3 (colors of the trajectories match initial states shown in A). Initial and final conformations are shown on the right (0 and 3.3 μs). (C) The same trajectories as in (B) presented in the conformational space defined by interdomain rotation and bending. To see this figure in color, go online.

Highly populated states CS2, CS3, and CS4 (Fig. 3, A and B), corresponded to the final states of the trajectories presented in Figs. 1 B and 2 B (runs R1, R3, and R0, respectively, Table 1). In the states CS2 and CS4, interdomain interactions were stabilized by the contacts between Ca<sup>2+</sup>-binding loops of C2A domain and α2 helix of C2B domain, similar to the state CS1. In contrast, the state CS3 was roughly symmetrical to the state CS1, with C2A Ca<sup>2+</sup>-binding loops being separated from the C2B domain (Fig. 3 B, C3). Notably, neither of the trajectories that started from unstable conformations (Figs. 1, E–G, and 2 B, runs 1–2) converged into state CS3. In contrast, all such trajectories converged into states CS1 or CS2, characterized by coupling of C2A Ca<sup>2+</sup>-binding loops with the C2B domain. Thus, it is

possible that the state CS3 represents a local energy minimum where the structure is trapped.

To address the question of energy difference between the states and to explore the energy barriers, we computed the average energies within each cluster, as well the energy profile along the trajectory R0 (Table 1), which produced a conformational transition between the states CS1 and CS4 (Fig. S4). The energy was computed as the energy of a protein plus the energy of nonbonded protein/water and protein/ions interactions. Interestingly, we found that the conformational transition between the states CS1 and CS4 was not associated with any significant energy barrier (Fig. S4 A). The state CS1 had the lowest energy (Fig. S4 B), as could be expected based on its high occupancy, however the

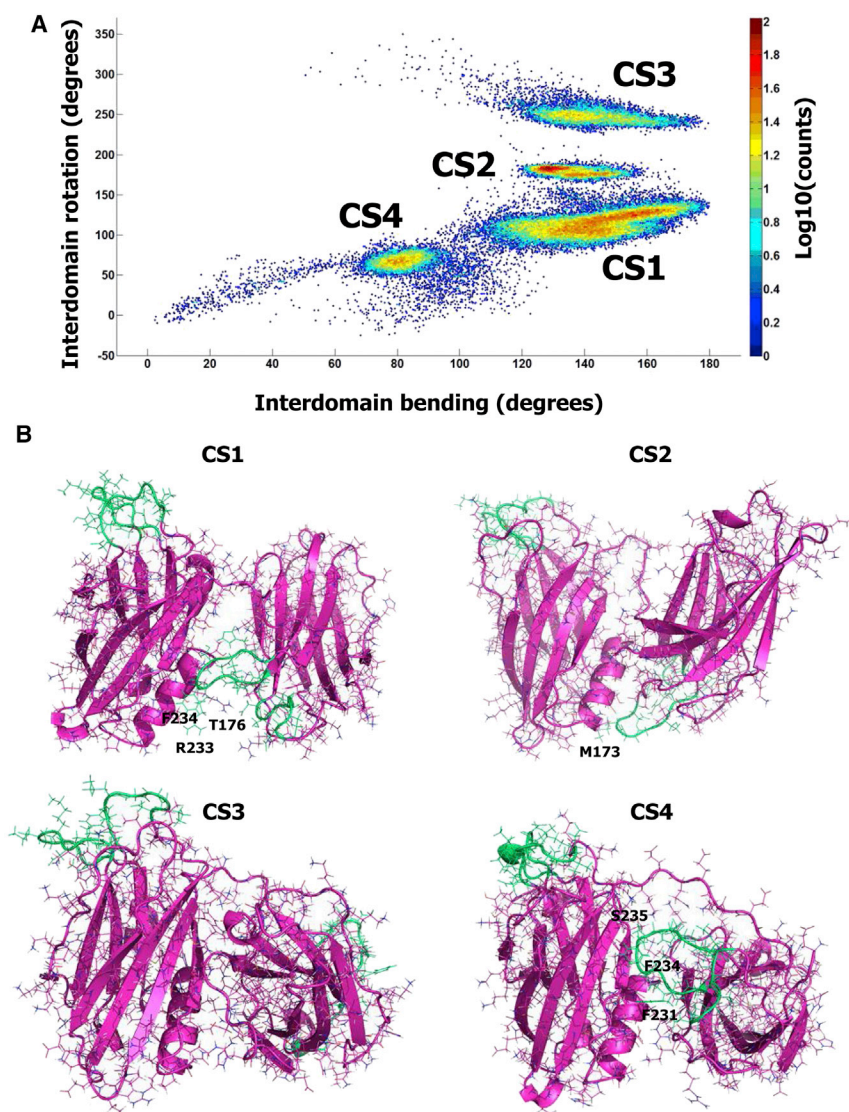

FIGURE 3 Highly populated conformational states of  $\text{Ca}^{2+}$ -unbound form of Syt1. (A) All the MD trajectories pooled together and plotted in the space of interdomain bending and rotation reveal four highly populated conformational states, CS1–CS4. Each point on the graph represents the number of observations color coded according to the logarithmic scale shown on the scale bar at all the trajectories pooled together. (B) States C1–C4 are shown with similar orientations of C2B domains. The residues of C2A  $\text{Ca}^{2+}$ -binding loops interacting with C2B domain are labeled. To see this figure in color, go online.

differences between the energies of the four states were within the fluctuations along trajectories (Fig. S4, A and B).

Notably, the four clusters describing the states CS1–CS4 (Fig. 3) are not entirely separated but show overlap. The clusters CS1, CS2, and CS4 overlap significantly (note multiple points between the clusters, Fig. 3 A), whereas cluster CS3 is somewhat isolated. However, intermediate trajectory points can be found even between the clusters CS3 and CS2 (Fig. 3 A, note *blue dots* between these two areas). Furthermore, the trajectories of all the MD runs taken together (Fig. 3 A, *blue dots*) cover the entire sterically permissive space of Syt1 configurations with tightly packed domains. This space represents a triangular pattern, where the highest values of the bending angle are only permissive at the values of the interdomain torsion angle being close to  $180^\circ$ , whereas lower bending angles are permissive at the values of the interdomain torsion angle approaching either  $0^\circ$  or  $360^\circ$ . In other words, the bending angle must increase

when C2A and C2B  $\text{Ca}^{2+}$ -binding pockets face the opposite sides, and the bending angle must decrease when  $\text{Ca}^{2+}$ -binding pockets face the same surface. Notably, MC sampling produced a similar triangular pattern for the low energy state (Fig. 2 A). This restriction on the conformational space is imposed by tight interactions between domains.

Interestingly, the states with  $\text{Ca}^{2+}$ -binding loops facing the same surface (interdomain torsion close to  $0^\circ$  or  $360^\circ$ ) proved to be unstable. Such states served as starting points for two trajectories (runs R1 and R1, Table 1; Fig. 2 B) and were occasionally observed along all the other trajectories presented in Figs. 1 and 2. However, all such states converged into conformations CS1–CS4. Furthermore, the states with separated domains proved to be unstable as well (note only brief and transient jumps in the values of the gyration radius in Figs. 1 and 2). Instead, all the highly populated states had tightly interacting domains (Fig. 3 B).

Thus, prolonged MD simulations combined with MC sampling demonstrated that in the absence of Ca<sup>2+</sup>, Syt1 exists as an ensemble of conformational states with tightly coupled domains, and these states are stable at a microsecond scale. These conformations are largely stabilized by the interactions between C2A Ca<sup>2+</sup>-binding loops and C2B domain, and in particular its  $\alpha 2$  helix. The most populated state (CS1) possesses some conformational flexibility and allows minor rearrangements within and between domains, thus comprising an ensemble of substates. One of these substates corresponds to the conformation obtained by crystallography (23).

### Ca<sup>2+</sup> binding destabilizes the interaction between the C2A and C2B domains and facilitates conformational transitions

Because Ca<sup>2+</sup>-binding loops of C2A domain play a prominent role in interdomain interactions, one could expect that Ca<sup>2+</sup> binding may affect Syt1 conformational dynamics. To test whether this is the case, we performed MD simulations of Syt1 in a Ca<sup>2+</sup>-bound form.

First, we created a model of C2AB Syt1 in a Ca<sup>2+</sup>-bound form. To do this, we performed sequential substitutions of K<sup>+</sup> ions that were present inside Ca<sup>2+</sup>-binding pockets of Syt1 by Ca<sup>2+</sup>. Initially, we examined the motions of K<sup>+</sup> ions along MD trajectories of Syt1 in a Ca<sup>2+</sup>-unbound form and found that K<sup>+</sup> ions were frequently moving in and out of both Ca<sup>2+</sup>-binding pockets and occasionally remained inside the pockets for nanoseconds. Two K<sup>+</sup> ions were occasionally present at the same time inside one of the pockets; however, we never detected more than two K<sup>+</sup> simultaneously present inside either of the pockets.

Next, we selected a trajectory point with two K<sup>+</sup> ions located inside the C2B Ca<sup>2+</sup>-binding pocket and replaced these two K<sup>+</sup> ions by Ca<sup>2+</sup> (the number of K<sup>+</sup> and Cl<sup>-</sup> in the cell was modified to keep the system electrically neutral). MD simulations (100 ns) of this new, to our knowledge, system were then performed and at the next step a trajectory point was selected with two K<sup>+</sup> ions trapped inside the C2A Ca<sup>2+</sup>-binding pocket. These two ions were in turn replaced by Ca<sup>2+</sup>. The obtained structure was stripped of water molecules and K<sup>+</sup> ions, optimized by MCM, and placed in a water box with K<sup>+</sup> and Cl<sup>-</sup> added to keep the system electrically neutral and yield 150 mM KCl. The system was equilibrated for 200 ns, and a 5.3  $\mu$ s production run was performed.

We found that the positions of Ca<sup>2+</sup> ions within the pockets remained stable during the entire simulation (Fig. 4). Two Ca<sup>2+</sup> ions within the C2B pocket formed coordination bonds with aspartates D363, D365, D371, and D303 (Fig. 4, A–D). The residue D365 formed two stable bonds with two Ca<sup>2+</sup> ions, whereas each of the other aspartates formed one stable coordination bond, with additional one or two transient bonds at stretches of the trajectory

(Fig. 4 D). Two additional residues, L307 and S308, formed transient bonds via their backbone carbonyl oxygens with one of the Ca<sup>2+</sup> ions (Fig. 4, B–D). The observed coordination is very similar to that reported for the isolated C2B domain (4) with one exception: the residue D309, which participated in Ca<sup>2+</sup> binding of the isolated C2B domain did not come into contact with either of the Ca<sup>2+</sup> ions at either point of the trajectory in this model.

Two Ca<sup>2+</sup> ions within the C2A binding pocket formed coordination bonds with aspartates D230, D232, D238, and D172 (Fig. 4, E–H), with each of the residues D172 and D238 forming three fairly stable bonds, whereas D232 and D230 formed two bonds each (Fig. 4, G and H). At stretches of the trajectory, remaining Ca<sup>2+</sup> coordination bonds were occupied by water molecules (removed from Fig. 4 for clarity). Ca<sup>2+</sup> ions were chelated tightly within the pocket, so that it did not appear feasible to fit an extra ion (Fig. 4 F). Although Ca<sup>2+</sup>-binding stoichiometry differed from that reported for the isolated C2A domain (14), the same aspartates (D172, D230, D232, D238) participated in chelating Ca<sup>2+</sup>. The only exception was the residue D178, which did not participate in Ca<sup>2+</sup> binding in our system.

Thus, our simulations suggest that C2AB Syt1 chelates four Ca<sup>2+</sup> ions, two at each of the Ca<sup>2+</sup>-binding pockets. This result agrees with the titration calorimetry study for C2AB Syt1 (22) and with Ca<sup>2+</sup>-binding stoichiometry obtained for the isolated C2B domain (15), but it does not reproduce Ca<sup>2+</sup> stoichiometry for the isolated C2A domain (14). To test whether our results could be influenced by the strategy we used to obtain the Ca<sup>2+</sup>-bound Syt1 form, we tried a different modeling approach.

To further explore the mechanism of Ca<sup>2+</sup> binding to Syt1, we performed MD simulations of Syt1 at elevated Ca<sup>2+</sup> levels. To do this, we took the CS1 state of Ca<sup>2+</sup>-unbound Syt1 (Fig. 3) in a water/KCl environment and replaced KCl by CaCl<sub>2</sub>, while keeping the system electrically neutral. This manipulation yielded ~100 mM Ca<sup>2+</sup>. Even though such Ca<sup>2+</sup> levels exceed the physiological concentration by orders of magnitude, our goal was to push the limits and to test whether three Ca<sup>2+</sup> ions could enter the C2A-binding pocket at artificially elevated Ca<sup>2+</sup> levels. We performed 3.4  $\mu$ s MD simulation for this system, and found that only two Ca<sup>2+</sup> ions were present inside each of the Ca<sup>2+</sup>-binding pockets in the end of the trajectory. Within the initial 50 ns of the simulation, two Ca<sup>2+</sup> ions entered the C2B-binding pocket and one Ca<sup>2+</sup> ion entered the C2A-binding pocket, whereas the fourth Ca<sup>2+</sup> ion entered the C2A-binding pocket after an additional 200 ns of the simulation. Subsequent 3.2  $\mu$ s of MD simulations did not alter Ca<sup>2+</sup> stoichiometry of Syt1. All four Ca<sup>2+</sup> ions remained inside the binding pockets until the end of the trajectory and formed coordination bonds with residues D303, D309, D363, D365, and D371 of the C2B domain and residues D178, D230, D232, and D238 of the C2A domain

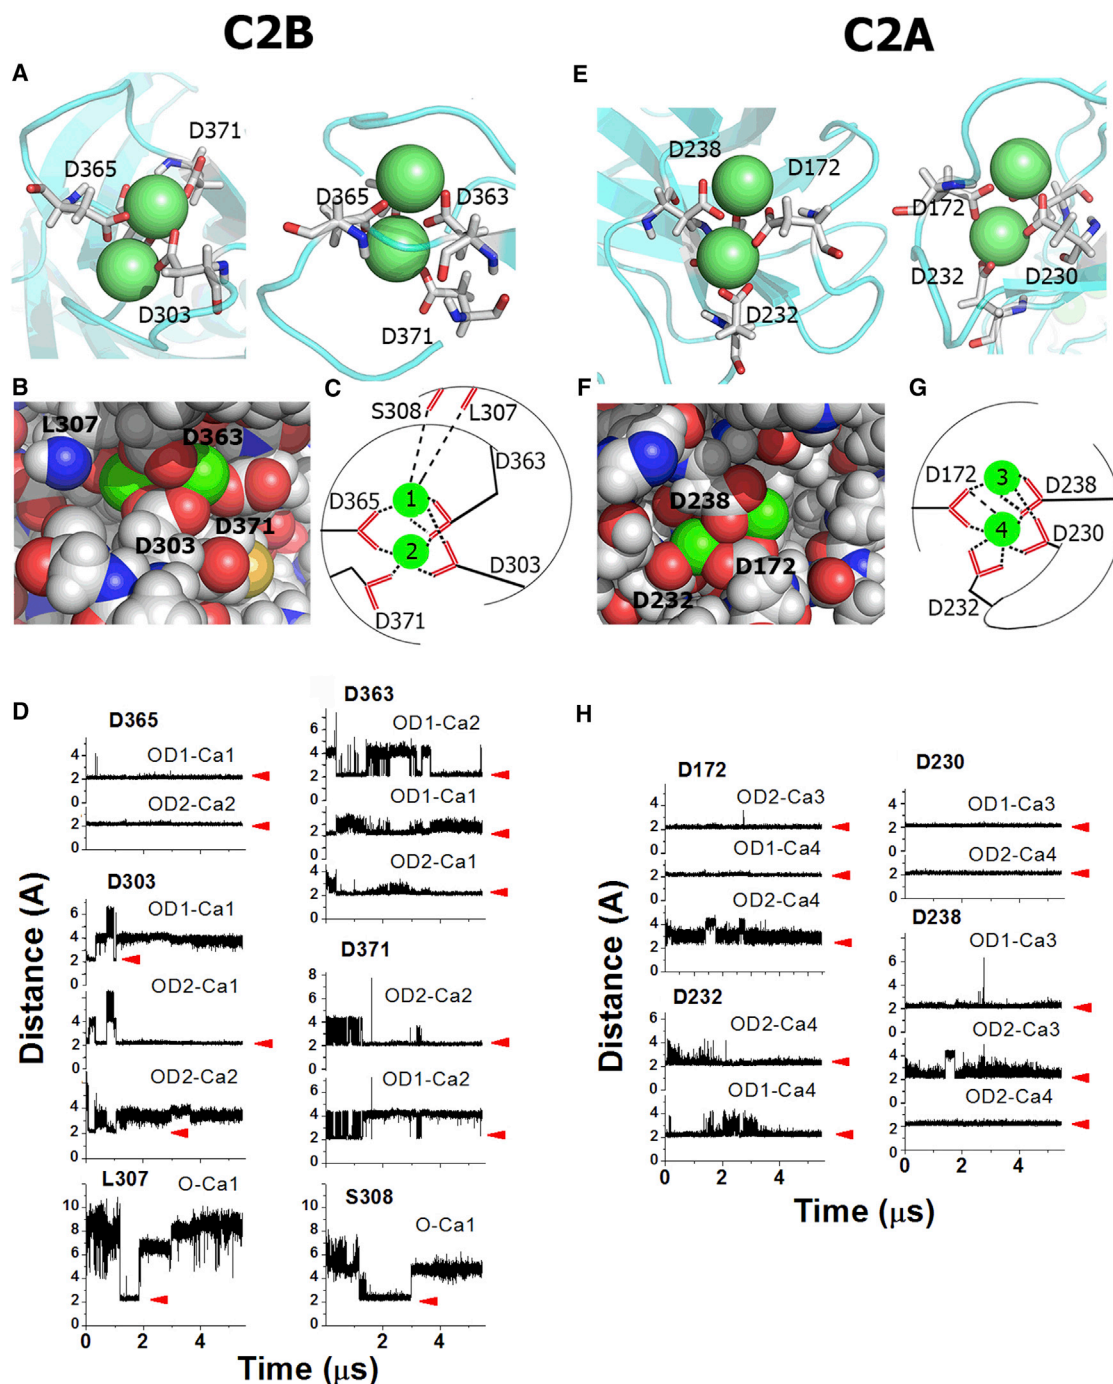

**FIGURE 4** The model of Ca<sup>2+</sup>-bound form of Syt1. (A) Two views (*from opposite sides*) of the C2B Ca<sup>2+</sup>-binding pocket. Residues forming coordination bonds are labeled. (B) Space filled model of Ca<sup>2+</sup> ions chelated at the C2B Ca<sup>2+</sup>-binding pocket. (C) Schematic representation of Ca<sup>2+</sup> coordination bonds at C2B domain. (D) Coordination bonds at C2B domain along the trajectory. The distances between Ca<sup>2+</sup> ions and oxygen atoms are plotted, red arrows mark formed coordination bonds. (E–H) Ca<sup>2+</sup> binding at the C2A domain (similar to A–D for C2B domain) is shown. To see this figure in color, go online.

(Fig. S3, A–C). The coordination bonds formed by Ca<sup>2+</sup> ions were similar to those obtained during the previous run (Fig. 4), with three following exceptions. First, residue D309 of C2B domain formed a transient coordination bond with one of the Ca<sup>2+</sup> ions during the latter MD run (Fig. S5 B). Second, residue D178 of C2A domain formed

a coordination bond (Fig. S5 C). Finally, residue D172 did not interact with any of the four chelated Ca<sup>2+</sup> ions during the latter run (Fig. S3 C).

We next questioned whether Ca<sup>2+</sup> binding may depend on the Syt1 conformational state. For example, if C2 domains are separated, Ca<sup>2+</sup> binding could more closely



reproduce the properties of isolated domains. To test this possibility, we performed MD simulations at elevated Ca<sup>2+</sup> levels, repeating the procedure described previously but using a different Syt1 conformation as a starting point. We selected a transient Syt1 state (*run R1* shown in Fig. 2 B at 200 ns) where C2A Ca<sup>2+</sup>-binding loops did not interact with the C2B domain (Fig. S5 D). We performed 3.3  $\mu$ s of MD simulations for this system, and as previously, only four Ca<sup>2+</sup> ions were chelated within Syt1 binding pockets, two ions at each domain (Fig. S5, D–F). Residues D363, D365, D371, D303, and D309 chelated two Ca<sup>2+</sup> inside the C2B pocket and residues D172, D178, D230, and D238 chelated two Ca<sup>2+</sup> ions inside the C2A pocket.

Finally, we attempted to manually insert the third Ca<sup>2+</sup> ion into the C2A Ca<sup>2+</sup>-binding pocket (Fig. S6). First, we examined the distance between C2A Ca<sup>2+</sup>-binding loops along the R4Ca trajectory (Fig. S6 A, *left*) and found that the loops open up at several trajectory points, thus enabling the insertion of the third Ca<sup>2+</sup> ion. We selected the trajectory point with a C2A binding pocket being open (Fig. S6 A, *arrow*) and inserted the third Ca<sup>2+</sup> ion (Fig. S6 B). The system was neutralized, and a water/ion environment was reequilibrated. Subsequent 250 ns simulation (Table 1, run R5Ca) demonstrated that chelation of three ions within the C2A domain involves the residue that does not belong to C2A Ca<sup>2+</sup>-binding loops (Fig. S6 C), namely glutamate E140. Such stoichiometry of Ca<sup>2+</sup> chelation is likely to represent a simulation artifact, because E140 is the N-terminus residue of the C2A-C2B fragment. In full length Syt1, glutamate E140 belongs to the linker between the Syt1 transmembrane domain and the C2A domain. In the vesicle attached full length Syt1 *in vivo* this linker is unlikely to provide sufficient flexibility for E140 interaction with the C2A Ca<sup>2+</sup>-binding pocket. Furthermore, there is no evidence in the literature that the residue E140 participates in Ca<sup>2+</sup> chelation. Thus, these simulations indicate that it is unlikely that three Ca<sup>2+</sup> ions become chelated within the C2A Ca<sup>2+</sup>-binding pocket in full-length Syt1 *in vivo*.

Thus, several MD runs performed at different conditions (Table 1, Ca<sup>2+</sup>-bound Syt1) suggest that Syt1 robustly binds four Ca<sup>2+</sup> ions, two at each domain. In agreement with earlier studies (14,15), these simulations show that Ca<sup>2+</sup> ions are chelated by aspartates D303, D309, D363, D365, and D371 of C2B domain and aspartates D172, D178, D230, D232, and D238 of C2B domain. Interestingly, these simulations also indicate that these residues may have different weights in Ca<sup>2+</sup> coordination. Thus, loop 2 (residues 363–371) of the C2B domain robustly interacted with both Ca<sup>2+</sup> ions, and aspartates D363, D365, and D371 formed stable coordination bonds. Loop 1 of the C2B domain (residues 303–309) appeared more flexible, and stable bonds were formed by D303, although the bonds formed by D309 were transient and were not detected in every run. Two Ca<sup>2+</sup> ions chelated within the C2A-binding pocket formed stable coordination bonds with residues

D230 and D238 of loop 2. In contrast, D232 and both aspartates of loop 1, D172 and D178, formed more transient bonds, and thus, may have a supportive role in Ca<sup>2+</sup> binding.

We next investigated how Ca<sup>2+</sup> binding affects Syt1 conformational dynamics. To do this, we analyzed the trajectory of Ca<sup>2+</sup>-bound Syt1 form (R4Ca, Table 1; Fig. 4), including interdomain rotations, gyration radius, and van der Waals energy of interactions between C2 domains. The trajectories obtained at high Ca<sup>2+</sup> levels (R1HCa and R2HCa, Table 1; Fig. S5) were not included in the analysis, because we reasoned that artificially elevated Ca<sup>2+</sup> may affect domain coupling. The analysis of 5.3  $\mu$ s MD trajectory of the Ca<sup>2+</sup>-bound form of Syt1 revealed numerous separations and rotations of C2 domains (Fig. 5 A). The domains separated after  $\sim$ 1  $\mu$ s of the simulation, and subsequently multiple conformational transitions occurred (Fig. 5 A; Fig. S7). The coupling between domains was not as tight as in the Ca<sup>2+</sup>-unbound state of Syt1, as illustrated by the comparison of the gyration radius and van der Waals energy of interdomain interactions of Ca<sup>2+</sup>-bound and Ca<sup>2+</sup>-unbound Syt1 forms (Fig. 5 B).

In the Ca<sup>2+</sup>-bound Syt1 form, the distribution of the gyration radius is shifted to the right (Fig. 5 B, *green versus black*). Notably, this distribution has the highest peak around 20.3  $\mu$ m for the Ca<sup>2+</sup>-unbound Syt1 form (Fig. 5 B, *black*), and this peak is absent for the Ca<sup>2+</sup>-bound form (Fig. 5 B, *green*). This peak corresponds to Syt1 conformations with tightly coupled and perpendicularly oriented domains, such as in the states C1, C3, and C4 (Fig. 3). On the other hand, a peak at 24.5 A exists for the Ca<sup>2+</sup>-bound Syt1 form (Fig. 5 B, *green*), and this peak is absent for the Ca<sup>2+</sup>-unbound Syt1 form. This peak corresponds to Syt1 topologies with C2 domains being separated and not interacting (for example, Fig. S4, points at 2, 2.5, and 3.3  $\mu$ s).

In line with these results, all the Ca<sup>2+</sup> free forms of Syt1 have negative van der Waals energy computed for interactions between C2A and C2B domains. Because van der Waals attractive forces decay rapidly as the distance between atoms increases, the negative van der Waals energy indicates tight domain coupling. In contrast, a large population of conformations with separated C2 domains existed within Ca<sup>2+</sup>-bound forms of Syt1. This is evident from a large peak at the probability density function at zero energy (Fig. 5 B, *right panel*), which corresponds to an absence of van der Waals interactions between C2 domains.

Clearly, the preference for the stretched linker and separated domains should facilitate conformational transitions for the Ca<sup>2+</sup>-bound Syt1 form. Indeed, the trajectory of Ca<sup>2+</sup>-bound Syt1 was characterized by frequent conformational transitions (Fig. 5 A; Fig. S4). Furthermore, a structure with separated domains would not impose any restrictions on domain configuration. Indeed, Syt1 topologies along the trajectory covered the entire conformational space defined by interdomain bending and rotation (Fig. 5 C).

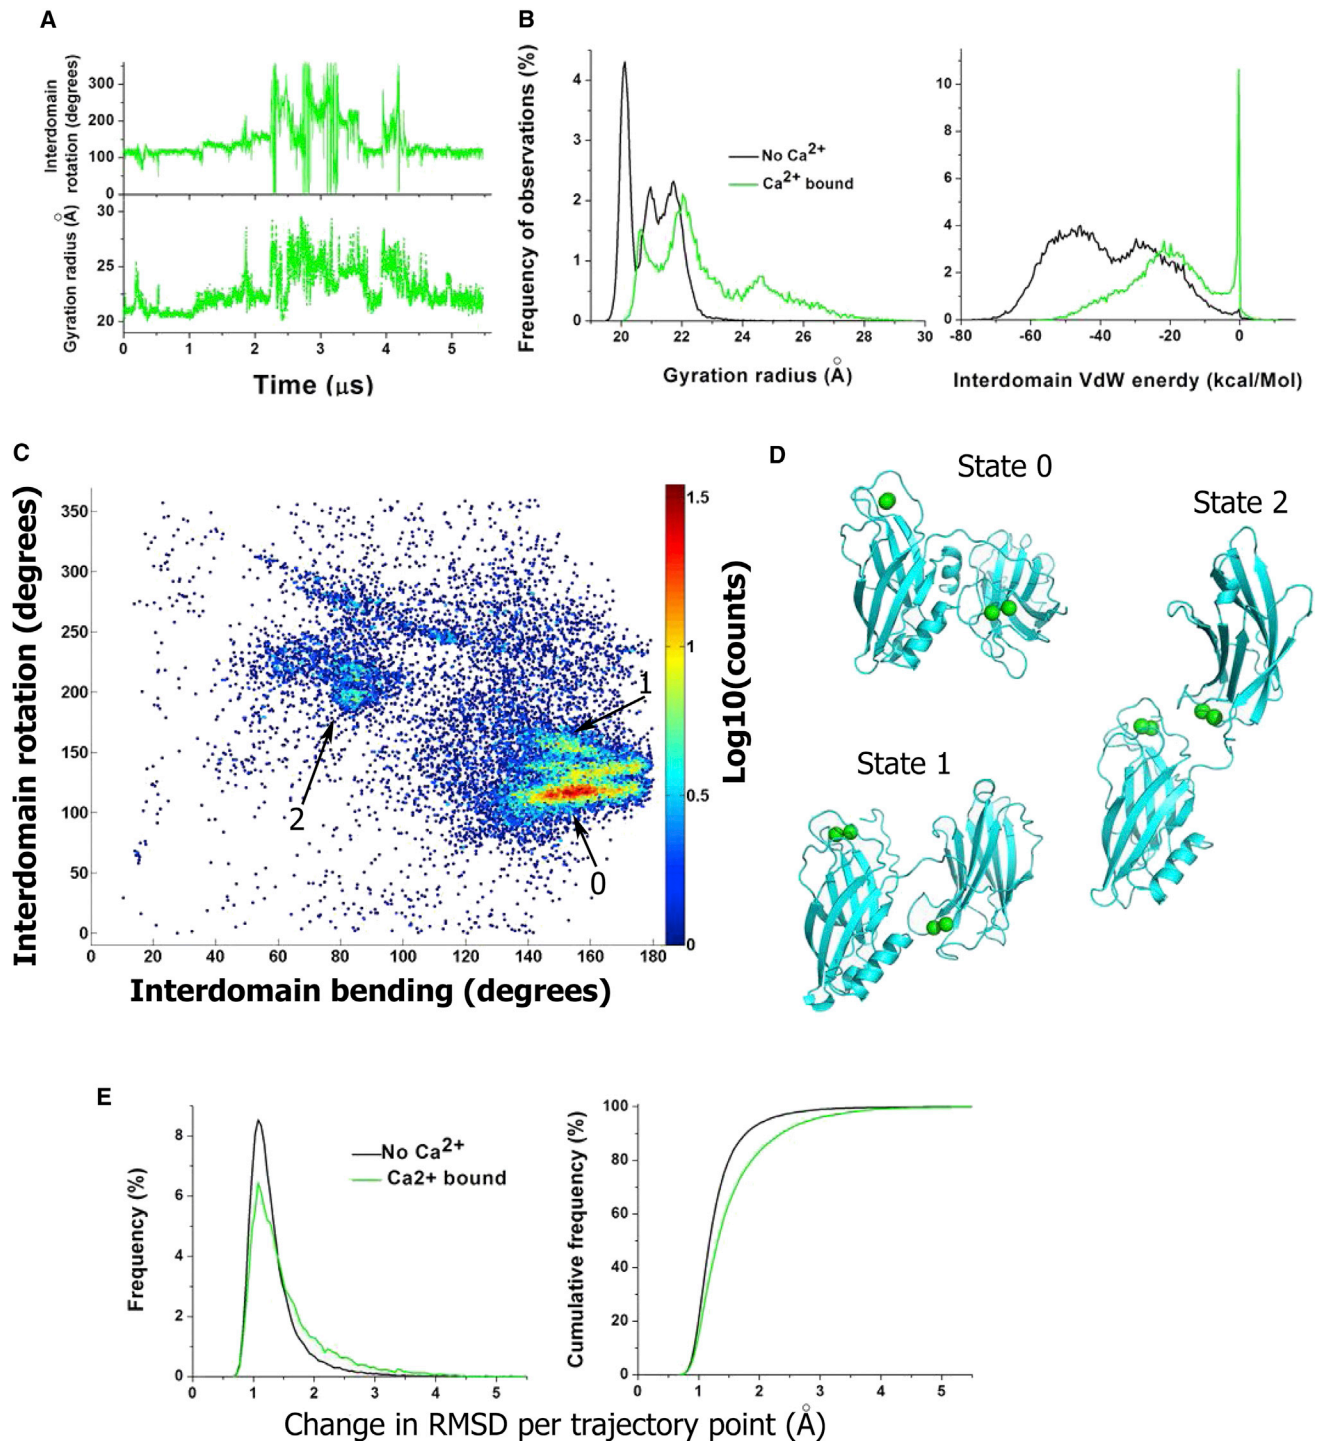

FIGURE 5 Conformational states of  $\text{Ca}^{2+}$ -bound form of Syt1. (A) MD trajectory showing multiple domain rotations (*top*) and domain separations (*bottom*), note fluctuations in the gyration radius). (B) The distributions of the gyration radius and van der Waals energy of interdomain interactions are shifted to the right for the  $\text{Ca}^{2+}$ -bound form of Syt1 (*green*). (C) MD trajectory shown in the space of interdomain bending and rotation. Each point on the graph shows a color-coded number of observations (per logarithmic scale on the *right*). Three highly populated states (0–matching the initial states, 1 and 2) are marked. (D) Three highly populated states (0–2). (E) Conformational flexibility is increased in the  $\text{Ca}^{2+}$ -bound form of Syt1. The graphs show frequency of observations (*left*) and cumulative frequency (*right*) for the change in RMSD per trajectory point (240 ps). RMSD was calculated for backbone atoms only. The change in RMSD per trajectory point is significantly higher for the  $\text{Ca}^{2+}$ -bound form ( $p < 0.001$  per K.S. test). To see this figure in color, go online

However, even though permissive topologies of the Ca<sup>2+</sup>-bound form of Syt1 occupied the entire conformational space (Fig. 5 C, blue dots), several states had an increased population density (Fig. 5 C, spots colored from cyan to red; Fig. 5 D, states 0–2). The state with the highest population density (state 0, Fig. 5, C and D), had a perpendicular orientation of C2 domains and was similar to state C1 of Ca<sup>2+</sup>-unbound Syt1 (Fig. 3), although the domains were not as tightly coupled in the Ca<sup>2+</sup>-bound form. The second state (state 2, Fig. 5, C and D), had more parallel orientation of C2 domains and Ca<sup>2+</sup>-binding pockets facing opposite surfaces. Finally, in the state 3, Ca<sup>2+</sup>-binding loops of C2 domains interacted with each other. Interestingly, neither of the highly populated states had Ca<sup>2+</sup>-binding pockets facing the same surface.

Thus, Ca<sup>2+</sup> binding significantly promotes conformational transitions of Syt1. This is illustrated in Fig. 5 E, showing the change in root mean-square deviation (RMSD) per trajectory point for the Ca<sup>2+</sup>-bound and Ca<sup>2+</sup>-unbound forms of Syt1. The distribution of the change in RMSD is shifted to the right for the Ca<sup>2+</sup>-bound form (Fig. 5 E), showing larger conformational transitions per trajectory point. Notably, the variability in RMSD in both Ca<sup>2+</sup>-free and Ca<sup>2+</sup>-bound Syt1 forms is largely produced by variations in C2 domain configuration, although only minor rearrangements were detected within C2 domains (Fig. S7). C2A domain did not undergo any significant changes within any of the trajectories, besides minor and transient variations in the arrangements of the loops. Somewhat larger variations within the C2B domain (Fig. S7, red) were produced by displacements of its C-terminus helix and did not involve any other conformational transitions within the domain.

In summary, our results show that Ca<sup>2+</sup> binding drastically changes the ensemble of Syt1 conformational states. Ca<sup>2+</sup>-unbound form of Syt1 represents an ensemble of distinct states with tightly coupled domains and infrequent conformational transitions, occurring at a microsecond scale (Fig. 3). In contrast, Ca<sup>2+</sup>-bound form of Syt1 represents a dynamic ensemble of conformations with frequently separating and rotating C2 domains (Fig. 5).

## DISCUSSION

In this study, we performed the first, to our knowledge, all-atom MD simulations of C2AB Syt1 at a microsecond scale. We found that Ca<sup>2+</sup> binding significantly enhances conformational flexibility of Syt1, promotes conformational states with separated domains, and accelerates conformational transitions, allowing C2 domains to rotate more freely. It is likely that such dramatic change in Syt1 conformational dynamics upon Ca<sup>2+</sup> binding would affect Syt1 function in vivo.

Ca<sup>2+</sup> binding to Syt1 is a major event in neuronal secretion, and thus structure and dynamics of Syt1 has been extensively studied. Spectroscopy studies suggested that

the structure of isolated Syt1 domains does not change upon Ca<sup>2+</sup> binding (39), although recent studies (40,41) challenged this conclusion. Considerable controversy exists on the issue of configuration of C2 domains, its dependence on Ca<sup>2+</sup> binding, and its function in vivo. Thus, a crystallography study (23) revealed tightly interacting domains, whereas optical studies suggested that in the solution C2 domains do not interact and can rotate freely (26). Furthermore, electron paramagnetic resonance studies suggest that Syt1 remains structurally heterogeneous even upon binding to the SNARE complex (42), although fluorescence resonance energy transfer studies (24,43) argue that Syt1 adopts a fixed conformation upon binding to the SNARE complex, with the C2B domain of Syt1 playing a primary role in these interactions.

Our analysis revealed that in the solution Ca<sup>2+</sup>-unbound form of Syt1 exists as an ensemble of conformers with tightly coupled domains. Notably, even in a water/ion environment Syt1 structure had a preference for domain configuration observed by crystallography. Highly populated conformational states of Syt1 revealed by our analysis had either perpendicularly oriented domains or parallel domains with Ca<sup>2+</sup>-binding pockets facing opposite surfaces. Interestingly, the configuration with Ca<sup>2+</sup>-binding pockets facing the same surface proved to be unstable.

To understand how Ca<sup>2+</sup> chelation would affect the ensemble of Syt1 conformers, we modeled Ca<sup>2+</sup> binding to C2AB Syt1. Our MD simulations suggest that each Ca<sup>2+</sup>-binding pocket of C2AB Syt1 chelates two Ca<sup>2+</sup> ions. In agreement with earlier studies (reviewed in (8)) our MD simulations demonstrated that Ca<sup>2+</sup> ions are chelated by five highly conserved aspartic acids at each domain: D172, D178, D230, D232, and D238 at C2A and D303, D309, D363, D365, and D371 at C2B. Interestingly, our simulations also demonstrated that these residues are never simultaneously involved in coordination with Ca<sup>2+</sup> ions. Instead, some of the aspartates formed several stable coordination bonds, whereas other aspartic acids formed transient bonds. For example, residues D230 and D238 of C2A domain formed stable coordination bonds, whereas other aspartates alternated in forming transient interactions. The latter finding can explain apparent controversies in structural studies, such as lack of involvement of D371 in Ca<sup>2+</sup> chelation observed by crystallography (44). Furthermore, the flexibility in Ca<sup>2+</sup> coordination could facilitate Syt1 interaction with lipids. A recent study (45) provides one such example, showing that residue D309 interacts both with Ca<sup>2+</sup> and phosphatidylserine.

Notably, our simulations closely reproduced stoichiometry of Ca<sup>2+</sup> binding for the isolated C2B domain (14) but not for the isolated C2A domain (15), because only two Ca<sup>2+</sup> ions were chelated at the C2A-binding pocket in our simulations. This result is in line with an earlier biochemical study (22), and it suggests that C2 domain interaction is likely to affect Syt1 Ca<sup>2+</sup>-binding properties.

Of importance, we found that the ensemble of Syt1 conformational states is significantly altered upon chelating  $\text{Ca}^{2+}$  ions. Our simulations demonstrated that in the  $\text{Ca}^{2+}$ -bound form, C2 domains are not tightly coupled, and they separate frequently creating configurations with a stretched linker. Respectively, domains rotate more freely and conformational transitions occur more frequently for the  $\text{Ca}^{2+}$ -bound form of Syt1.

It should be noted that Syt1 is attached to a synaptic vesicle via its transmembrane domain, and therefore configuration and dynamics of C2 domains may be influenced by their proximity to the vesicle membrane. Furthermore, once the vesicle is docked, Syt1 becomes positioned within a relatively narrow gap between the vesicle and the plasma membrane, and its domains may interact with both membranes. Our findings have important implications for understanding the dynamic of this process and for elucidating the mechanisms of synaptic vesicle fusion triggered by the inflow of calcium and its chelation by Syt1.

Indeed, numerous studies suggest that coordinated insertion of the tips of C2 domains into phospholipids mediate synaptic vesicle docking and fusion (reviewed in (8)). For example, a model was proposed (46) whereby the tips of C2 domains insert into the plasma membrane upon  $\text{Ca}^{2+}$  binding and thus create a membrane tension required to open the fusion pore (47). Such model implies that  $\text{Ca}^{2+}$ -binding pockets of C2 domains would face the same surface. Our MD simulations suggest that such a conformational state would not be stable for the  $\text{Ca}^{2+}$ -unbound form of Syt1; however,  $\text{Ca}^{2+}$  binding would promote domain rotations and thus increase the likelihood for the appropriate domain configuration to occur. These findings suggests that  $\text{Ca}^{2+}$  binding, besides neutralizing the negative charge of  $\text{Ca}^{2+}$ -binding loops and enabling their insertion into lipids, also accelerates a transition into the conformational state with  $\text{Ca}^{2+}$ -binding pockets facing the same surface. Such a scenario could explain the observation that the release process slows down upon neutralization of the aspartic acids chelating  $\text{Ca}^{2+}$  at C2A domain (20).

In addition to opening the fusion pore, Syt1 is thought to mediate synaptic vesicle docking (6,48–50), possibly through bridging two opposing membranes (9,22,45,51). The latter model implies that Syt1 adopts a conformation with  $\text{Ca}^{2+}$ -binding pockets of C2 domains facing opposite surfaces (9,51). Our simulations demonstrated that one of the stable and highly populated Syt1 conformers (*state C2*, Fig. 3) satisfies this condition. When Syt1 adopts C2 conformation, the distance between its  $\text{Ca}^{2+}$ -binding pockets equals  $\sim 5$  nm. Because electrostatic repulsion between bilayers becomes prominent at a distance of 2–3 nm (52), it is a plausible scenario that Syt1 adopts the state with opposing  $\text{Ca}^{2+}$ -binding pockets, bridges the membranes, and brings bilayers at a distance where electrostatic repulsion becomes prominent (6). Initially, charged residues of  $\text{Ca}^{2+}$ -binding loops may interact with lipids

(53), and subsequently  $\text{Ca}^{2+}$  chelation would promote a further insertion of domain tips into lipids. Such bridging of bilayers could occur in cooperation with partial SNARE zippering (11,54,55).

Thus, the results of our simulations shed light on the overall dynamics of multifaceted Syt1 function in the release process. Syt1 is thought to act at multiple stages of  $\text{Ca}^{2+}$ -dependent exocytosis (reviewed in (7,8)) including synaptic vesicles docking, possibly fusion clamping (56,57), and triggering fusion upon  $\text{Ca}^{2+}$  inflow. Our simulations, within the framework of earlier studies of Syt1 structure, dynamics, and function, suggest a plausible scenario for Syt1 multistep action in the fusion process. Syt1 may adopt a stable and highly populated state with  $\text{Ca}^{2+}$ -binding pockets facing opposite surfaces and initiate bridging the synaptic membrane and the vesicle via the interactions of charged residues of  $\text{Ca}^{2+}$ -binding loops with lipids. Next,  $\text{Ca}^{2+}$  elevation, such as residual  $\text{Ca}^{2+}$  or  $\text{Ca}^{2+}$  released from internal stores (reviewed in (58)) would promote  $\text{Ca}^{2+}$ -bound Syt1 form and respectively induce deeper insertion of domain tips into lipid bilayers. This stage may be associated with an interaction between Syt1 and the SNARE complex, partial SNARE zippering, and a transition of Syt1 into a different conformational state. Subsequently,  $\text{Ca}^{2+}$  ions may dissociate from Syt1 thus causing a stabilization of the Syt1 conformational state, which may then contribute to a fusion clamp within the primed prefusion complex. Subsequently,  $\text{Ca}^{2+}$  influx triggered by an action potential would induce  $\text{Ca}^{2+}$  chelation by Syt1 followed by an enhanced conformational flexibility of Syt1, a conformational transition, and insertion of  $\text{Ca}^{2+}$ -binding pockets into the plasma membrane, creating a membrane tension and triggering fusion.

## SUPPORTING MATERIAL

Eight figures are available at [http://www.biophysj.org/biophysj/supplemental/S0006-3495\(15\)00385-9](http://www.biophysj.org/biophysj/supplemental/S0006-3495(15)00385-9)

## AUTHOR CONTRIBUTIONS

M.B. designed and performed research, analyzed data, and wrote the article.

## ACKNOWLEDGMENTS

We thank Drs. J. Troy Littleton and Anand Jagota for productive discussions. Simulations were performed at Anton supercomputer (D. E. Show Research and Pittsburg Supercomputer Center) and XSEDE resources (Stampede supercomputer at TACC).

This study was supported by grant R01 099557 from the National Institute of Mental Health (NIMH).

## REFERENCES

1. Brose, N., A. G. Petrenko, ..., R. Jahn. 1992. Synaptotagmin: a calcium sensor on the synaptic vesicle surface. *Science*. 256:1021–1025.

2. Geppert, M., Y. Goda, ..., T. C. Südhof. 1994. Synaptotagmin I: a major Ca<sup>2+</sup> sensor for transmitter release at a central synapse. *Cell*. 79:717–727.
3. Littleton, J. T., M. Stern, ..., H. J. Bellen. 1994. Calcium dependence of neurotransmitter release and rate of spontaneous vesicle fusions are altered in *Drosophila* synaptotagmin mutants. *Proc. Natl. Acad. Sci. USA*. 91:10888–10892.
4. Fernández-Chacón, R., A. Königstorfer, ..., T. C. Südhof. 2001. Synaptotagmin I functions as a calcium regulator of release probability. *Nature*. 410:41–49.
5. Yoshihara, M., and J. T. Littleton. 2002. Synaptotagmin I functions as a calcium sensor to synchronize neurotransmitter release. *Neuron*. 36:897–908.
6. Jahn, R., and D. Fasshauer. 2012. Molecular machines governing exocytosis of synaptic vesicles. *Nature*. 490:201–207.
7. Südhof, T. C. 2013. Neurotransmitter release: the last millisecond in the life of a synaptic vesicle. *Neuron*. 80:675–690.
8. Chapman, E. R. 2008. How does synaptotagmin trigger neurotransmitter release? *Annu. Rev. Biochem.* 77:615–641.
9. Herrick, D. Z., W. Kuo, ..., D. S. Cafiso. 2009. Solution and membrane-bound conformations of the tandem C2A and C2B domains of synaptotagmin I: evidence for bilayer bridging. *J. Mol. Biol.* 390:913–923.
10. de Wit, H., A. M. Walter, ..., M. Verhage. 2009. Synaptotagmin-1 docks secretory vesicles to syntaxin-1/SNAP-25 acceptor complexes. *Cell*. 138:935–946.
11. Parisotto, D., J. Malsam, ..., T. H. Söllner. 2012. SNAREpin assembly by Munc18-1 requires previous vesicle docking by synaptotagmin I. *J. Biol. Chem.* 287:31041–31049.
12. Imig, C., S. W. Min, ..., B. H. Cooper. 2014. The morphological and molecular nature of synaptic vesicle priming at presynaptic active zones. *Neuron*. 84:416–431.
13. Perin, M. S., N. Brose, ..., T. C. Südhof. 1991. Domain structure of synaptotagmin (p65). *J. Biol. Chem.* 266:623–629.
14. Ubach, J., X. Zhang, ..., J. Rizo. 1998. Ca<sup>2+</sup> binding to synaptotagmin: how many Ca<sup>2+</sup> ions bind to the tip of a C2-domain? *EMBO J.* 17:3921–3930.
15. Fernandez, I., D. Araç, ..., J. Rizo. 2001. Three-dimensional structure of the synaptotagmin I C2B-domain: synaptotagmin I as a phospholipid binding machine. *Neuron*. 32:1057–1069.
16. Littleton, J. T., J. Bai, ..., E. R. Chapman. 2001. synaptotagmin mutants reveal essential functions for the C2B domain in Ca<sup>2+</sup>-triggered fusion and recycling of synaptic vesicles in vivo. *J. Neurosci.* 21:1421–1433.
17. Mackler, J. M., J. A. Drummond, ..., N. E. Reist. 2002. The C(2)B Ca(2+)-binding motif of synaptotagmin is required for synaptic transmission in vivo. *Nature*. 418:340–344.
18. Nishiki, T., and G. J. Augustine. 2004. Dual roles of the C2B domain of synaptotagmin I in synchronizing Ca<sup>2+</sup>-dependent neurotransmitter release. *J. Neurosci.* 24:8542–8550.
19. Stevens, C. F., and J. M. Sullivan. 2003. The synaptotagmin C2A domain is part of the calcium sensor controlling fast synaptic transmission. *Neuron*. 39:299–308.
20. Yoshihara, M., Z. Guan, and J. T. Littleton. 2010. Differential regulation of synchronous versus asynchronous neurotransmitter release by the C2 domains of synaptotagmin I. *Proc. Natl. Acad. Sci. USA*. 107:14869–14874.
21. Striegel, A. R., L. M. Biela, ..., N. E. Reist. 2012. Calcium binding by synaptotagmin's C2A domain is an essential element of the electrostatic switch that triggers synchronous synaptic transmission. *J. Neurosci.* 32:1253–1260.
22. Radhakrishnan, A., A. Stein, ..., D. Fasshauer. 2009. The Ca<sup>2+</sup> affinity of synaptotagmin I is markedly increased by a specific interaction of its C2B domain with phosphatidylinositol 4,5-bisphosphate. *J. Biol. Chem.* 284:25749–25760.
23. Fuson, K. L., M. Montes, ..., R. B. Sutton. 2007. Structure of human synaptotagmin I C2AB in the absence of Ca<sup>2+</sup> reveals a novel domain association. *Biochemistry*. 46:13041–13048.
24. Choi, U. B., P. Strop, ..., K. R. Weninger. 2010. Single-molecule FRET-derived model of the synaptotagmin I-SNARE fusion complex. *Nat. Struct. Mol. Biol.* 17:318–324.
25. Araç, D., X. Chen, ..., J. Rizo. 2006. Close membrane-membrane proximity induced by Ca(2+)-dependent multivalent binding of synaptotagmin-1 to phospholipids. *Nat. Struct. Mol. Biol.* 13:209–217.
26. Huang, H., and D. S. Cafiso. 2008. Conformation and membrane position of the region linking the two C2 domains in synaptotagmin 1 by site-directed spin labeling. *Biochemistry*. 47:12380–12388.
27. Bai, J., P. Wang, and E. R. Chapman. 2002. C2A activates a cryptic Ca(2+)-triggered membrane penetration activity within the C2B domain of synaptotagmin I. *Proc. Natl. Acad. Sci. USA*. 99:1665–1670.
28. Hui, E., J. Bai, and E. R. Chapman. 2006. Ca<sup>2+</sup>-triggered simultaneous membrane penetration of the tandem C2-domains of synaptotagmin I. *Biophys. J.* 91:1767–1777.
29. Liu, H., H. Bai, ..., E. R. Chapman. 2014. Linker mutations reveal the complexity of synaptotagmin I action during synaptic transmission. *Nat. Neurosci.* 17:670–677.
30. Fealey, M. E., J. W. Gauer, ..., A. Hinderliter. 2012. Negative coupling as a mechanism for signal propagation between C2 domains of synaptotagmin I. *PLoS ONE*. 7:e46748.
31. Augustine, G. J., M. P. Charlton, and S. J. Smith. 1985. Calcium entry and transmitter release at voltage-clamped nerve terminals of squid. *J. Physiol.* 367:163–181.
32. Sabatini, B. L., and W. G. Regehr. 1996. Timing of neurotransmission at fast synapses in the mammalian brain. *Nature*. 384:170–172.
33. Lisman, J. E., S. Raghavachari, and R. W. Tsien. 2007. The sequence of events that underlie quantal transmission at central glutamatergic synapses. *Nat. Rev. Neurosci.* 8:597–609.
34. Li, Z., and H. A. Scheraga. 1987. Monte Carlo-minimization approach to the multiple-minima problem in protein folding. *Proc. Natl. Acad. Sci. USA*. 84:6611–6615.
35. Tikhonov, D. B., and B. S. Zhorov. 2012. Architecture and pore block of eukaryotic voltage-gated sodium channels in view of NavAb bacterial sodium channel structure. *Mol. Pharmacol.* 82:97–104.
36. Shaw, D. E., R. O. Dror, ..., B. Towles. 2009. Millisecond-scale molecular dynamics simulations on Anton. *Proceedings of the Conference on High Performance Computing, Networking, Storage and Analysis SC09*. New York, ACM. Ref Type: Generic.
37. Phillips, J. C., R. Braun, ..., K. Schulten. 2005. Scalable molecular dynamics with NAMD. *J. Comput. Chem.* 26:1781–1802.
38. Mackerell, Jr., A. D. 2004. Empirical force fields for biological macromolecules: overview and issues. *J. Comput. Chem.* 25:1584–1604.
39. Shao, X., I. Fernandez, ..., J. Rizo. 1998. Solution structures of the Ca<sup>2+</sup>-free and Ca<sup>2+</sup>-bound C2A domain of synaptotagmin I: does Ca<sup>2+</sup> induce a conformational change? *Biochemistry*. 37:16106–16115.
40. Gauer, J. W., R. Sisk, ..., A. Hinderliter. 2012. Mechanism for calcium ion sensing by the C2A domain of synaptotagmin I. *Biophys. J.* 103:238–246.
41. Wu, Z., and K. Schulten. 2014. Synaptotagmin's role in neurotransmitter release likely involves Ca(2+)-induced conformational transition. *Biophys. J.* 107:1156–1166.
42. Lai, A. L., H. Huang, ..., D. S. Cafiso. 2011. Synaptotagmin I and SNAREs form a complex that is structurally heterogeneous. *J. Mol. Biol.* 405:696–706.
43. Krishnakumar, S. S., D. Kümmel, ..., J. E. Rothman. 2013. Conformational dynamics of calcium-triggered activation of fusion by synaptotagmin. *Biophys. J.* 105:2507–2516.
44. Cheng, Y., S. M. Sequeira, ..., D. J. Patel. 2004. Crystallographic identification of Ca<sup>2+</sup> and Sr<sup>2+</sup> coordination sites in synaptotagmin I C2B domain. *Protein Sci.* 13:2665–2672.

45. Honigmann, A., G. van den Bogaart, ..., R. Jahn. 2013. Phosphatidylinositol 4,5-bisphosphate clusters act as molecular beacons for vesicle recruitment. *Nat. Struct. Mol. Biol.* 20:679–686.
46. Paddock, B. E., A. R. Striegel, ..., N. E. Reist. 2008. Ca<sup>2+</sup>-dependent, phospholipid-binding residues of synaptotagmin are critical for excitation-secretion coupling in vivo. *J. Neurosci.* 28:7458–7466.
47. Martens, S., M. M. Kozlov, and H. T. McMahon. 2007. How synaptotagmin promotes membrane fusion. *Science.* 316:1205–1208.
48. Wang, Z., H. Liu, ..., E. R. Chapman. 2011. Reconstituted synaptotagmin I mediates vesicle docking, priming, and fusion. *J. Cell Biol.* 195:1159–1170.
49. Kim, J. Y., B. K. Choi, ..., N. K. Lee. 2012. Solution single-vesicle assay reveals PIP<sub>2</sub>-mediated sequential actions of synaptotagmin-1 on SNAREs. *EMBO J.* 31:2144–2155.
50. Lai, Y., X. Lou, ..., Y. K. Shin. 2013. The synaptotagmin 1 linker may function as an electrostatic zipper that opens for docking but closes for fusion pore opening. *Biochem. J.* 456:25–33.
51. Kuo, W., D. Z. Herrick, and D. S. Cafiso. 2011. Phosphatidylinositol 4,5-bisphosphate alters synaptotagmin 1 membrane docking and drives opposing bilayers closer together. *Biochemistry.* 50:2633–2641.
52. Bykhovskaia, M., A. Jagota, ..., J. T. Littleton. 2013. Interaction of the complexin accessory helix with the C-terminus of the SNARE complex: molecular-dynamics model of the fusion clamp. *Biophys. J.* 105:679–690.
53. Wang, P., C. T. Wang, ..., E. R. Chapman. 2003. Mutations in the effector binding loops in the C2A and C2B domains of synaptotagmin I disrupt exocytosis in a nonadditive manner. *J. Biol. Chem.* 278:47030–47037.
54. Walter, A. M., K. Wiederhold, ..., J. B. Sørensen. 2010. Synaptobrevin N-terminally bound to syntaxin-SNAP-25 defines the primed vesicle state in regulated exocytosis. *J. Cell Biol.* 188:401–413.
55. Zorman, S., A. A. Rebane, ..., Y. Zhang. 2014. Common intermediates and kinetics, but different energetics, in the assembly of SNARE proteins. *eLife.* 3:e03348.
56. Wang, C. T., J. C. Lu, ..., M. B. Jackson. 2003. Different domains of synaptotagmin control the choice between kiss-and-run and full fusion. *Nature.* 424:943–947.
57. Chicka, M. C., E. Hui, ..., E. R. Chapman. 2008. Synaptotagmin arrests the SNARE complex before triggering fast, efficient membrane fusion in response to Ca<sup>2+</sup>. *Nat. Struct. Mol. Biol.* 15:827–835.
58. Kaeser, P. S., and W. G. Regehr. 2014. Molecular mechanisms for synchronous, asynchronous, and spontaneous neurotransmitter release. *Annu. Rev. Physiol.* 76:333–363.

**Biophysical Journal**

**Supporting Material**

**Calcium Binding Promotes Conformational Flexibility of the Neuronal  
Ca<sup>2+</sup> Sensor Synaptotagmin**

Maria Bykhovskaia<sup>1,\*</sup>

<sup>1</sup>Neuroscience Department, Universidad Central del Caribe, Bayamon, Puerto Rico

## Supplemental Material

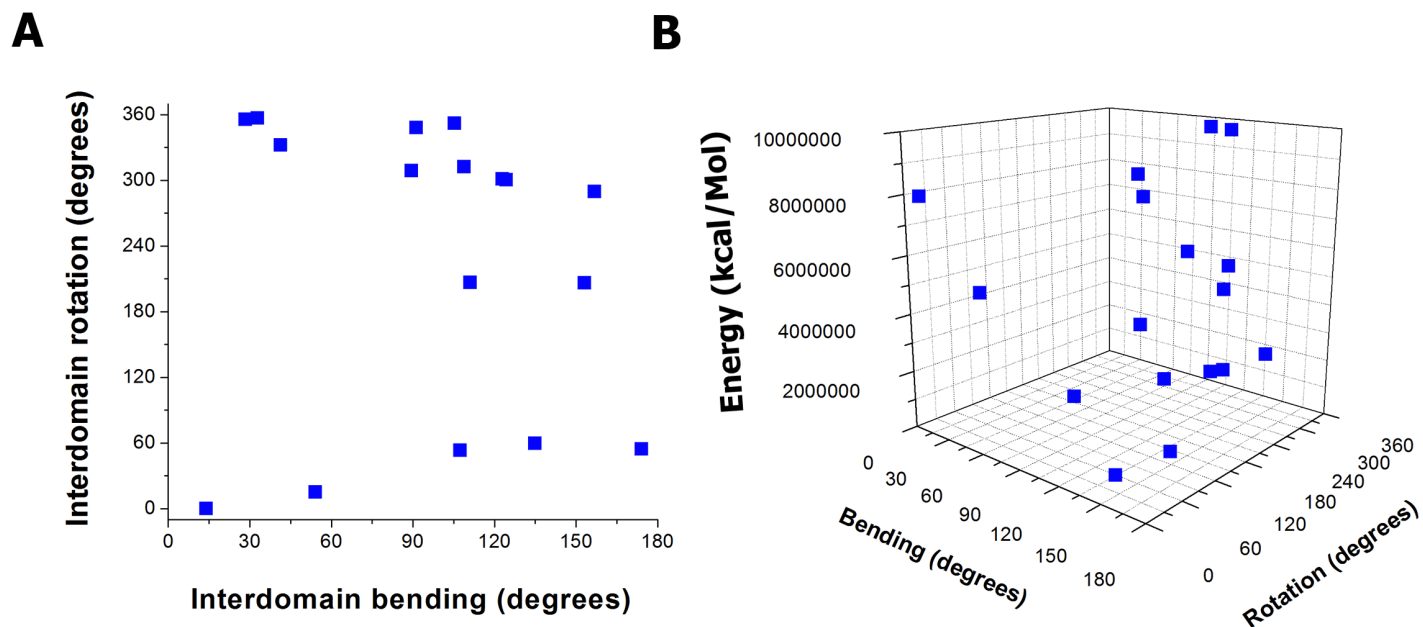

**Fig. S1.** MC sampling of Syt1 conformational space. The set of MC generated initial structures of Syt1 in the space of interdomain bending and rotation (A) and their energies (B) before optimization. The energy of the Syt1 conformation obtained by crystallography is taken as zero energy reference point.



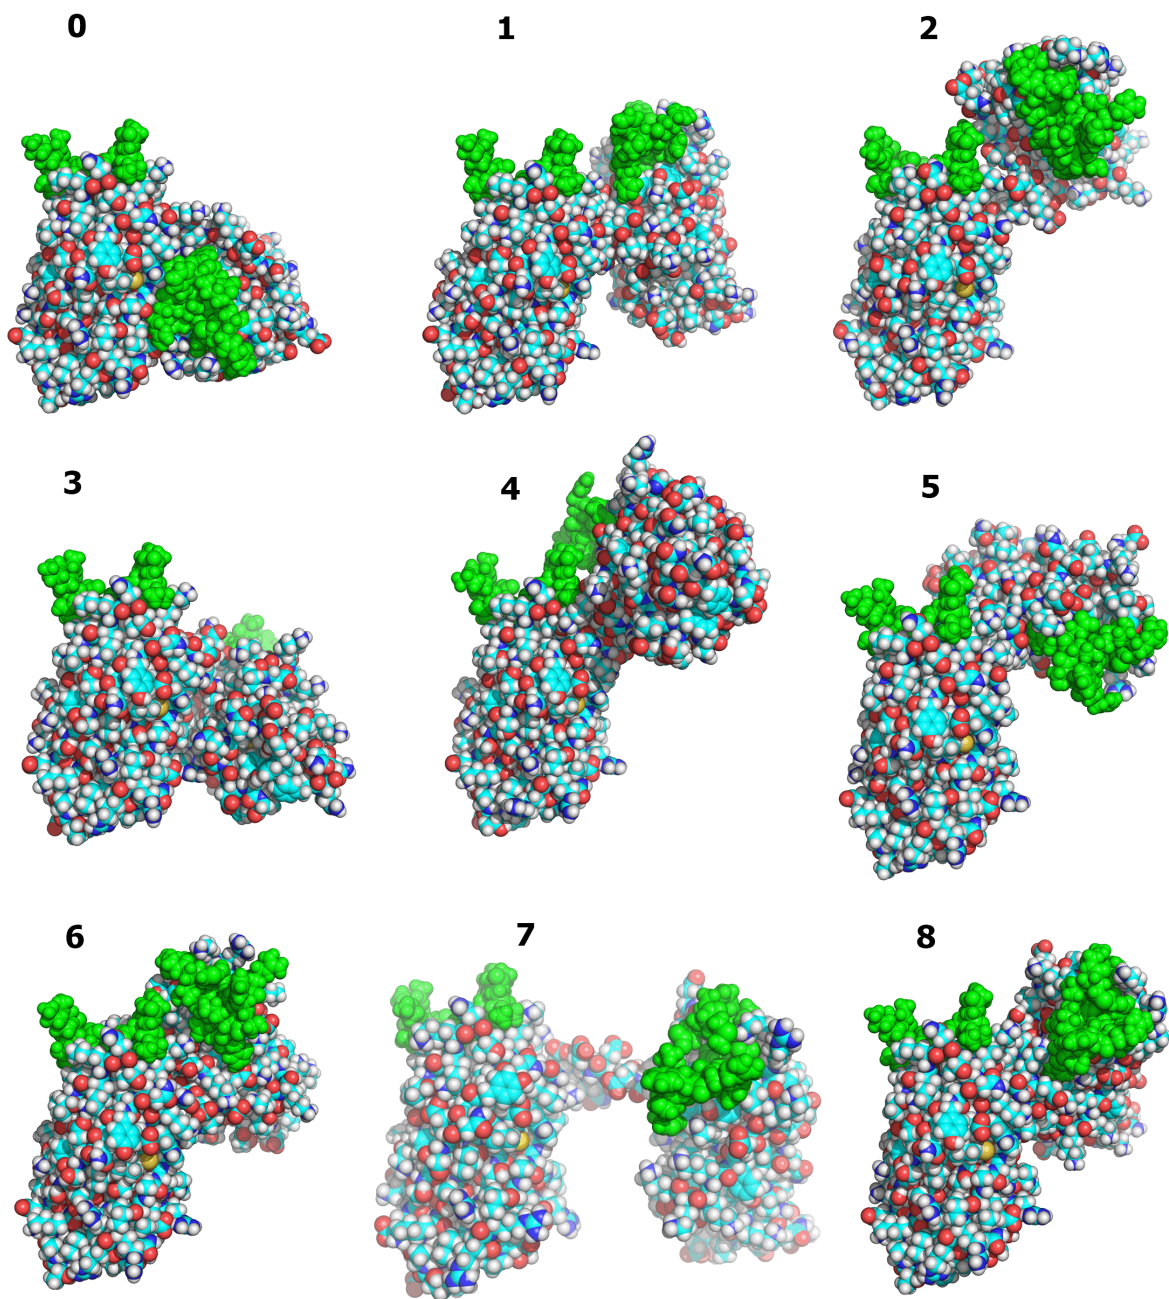

**Fig. S2.** Space filled models of the conformational states (1-8) generated employing MC smapling of the backbone tortsion angles of the linker and MCM-optimized. State 0 corresponds to the structure obained by crystallography. The structures are shown with a similar orientation of the C2B domain (left). Ca<sup>2+</sup>-binding loops are colored green, the rest of the strucures are colored by the atom type: oxygen –red; carbon – cyan; hydrogen-while; nitrogen-blue.

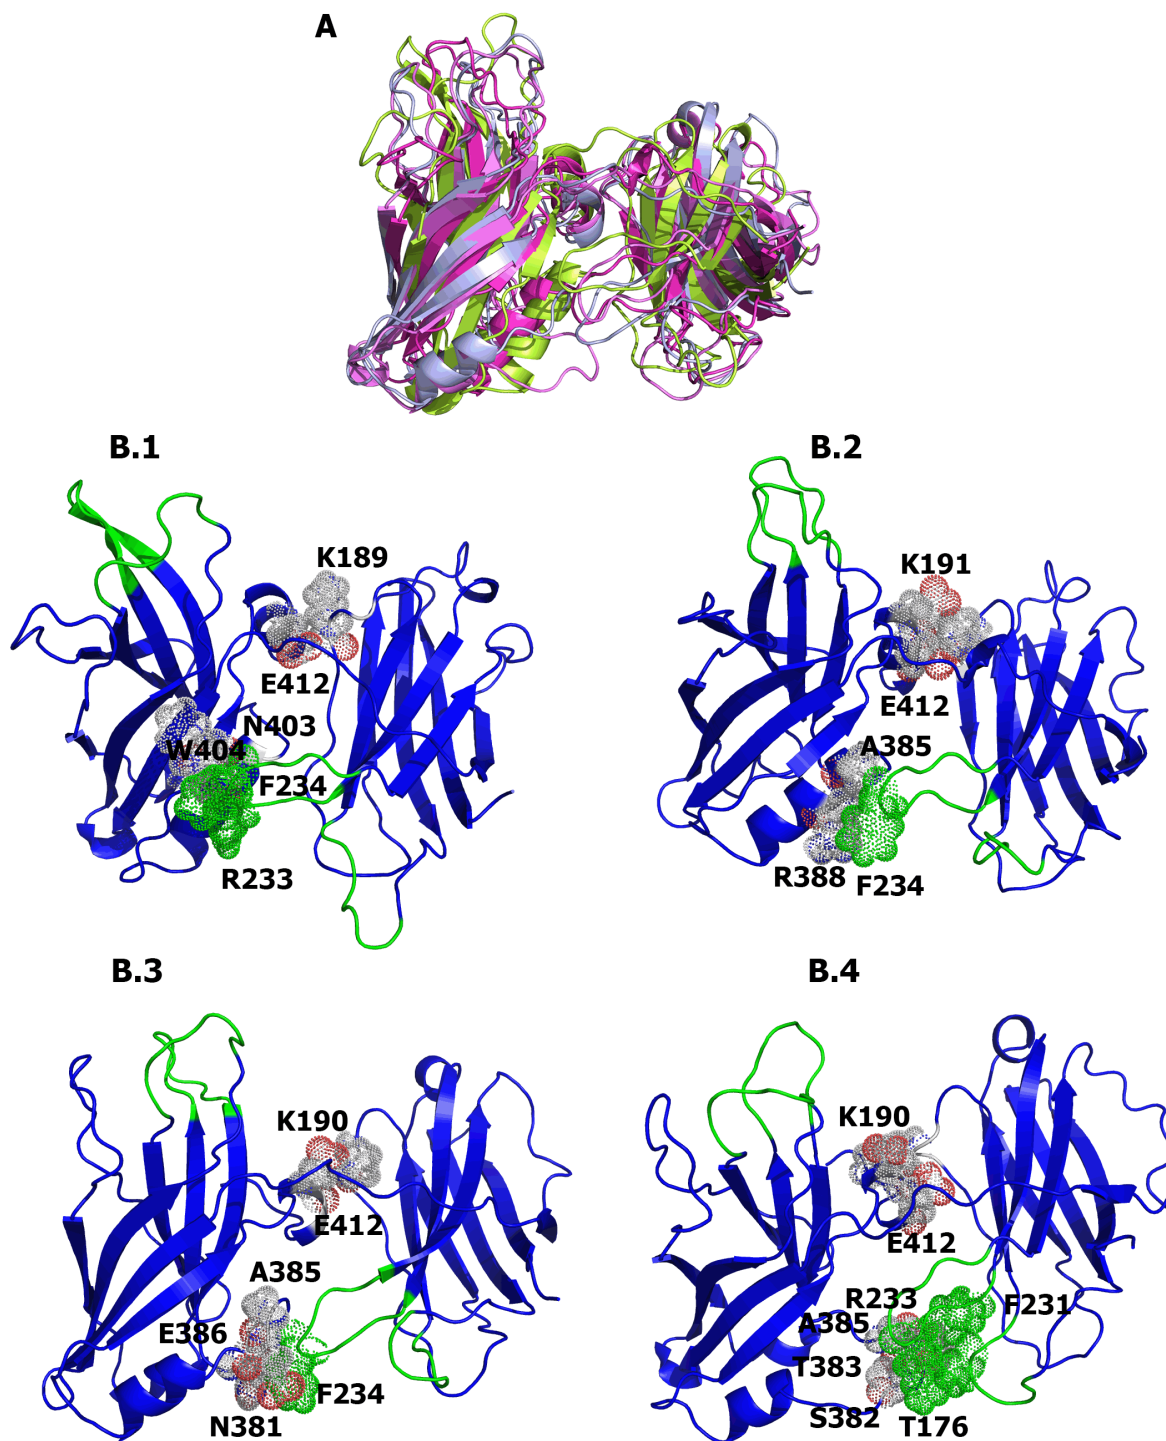

**Fig. S3.** Substates of the highly populated conformational state CS1. **A.** Four substates overlaid, showing mild variability in the backbone topology. **B.** Individual structures of four substates. Residues at the interface of C2 domains are shown as space filled models and labeled. All the residues of Ca<sup>2+</sup> binding loops are colored green.

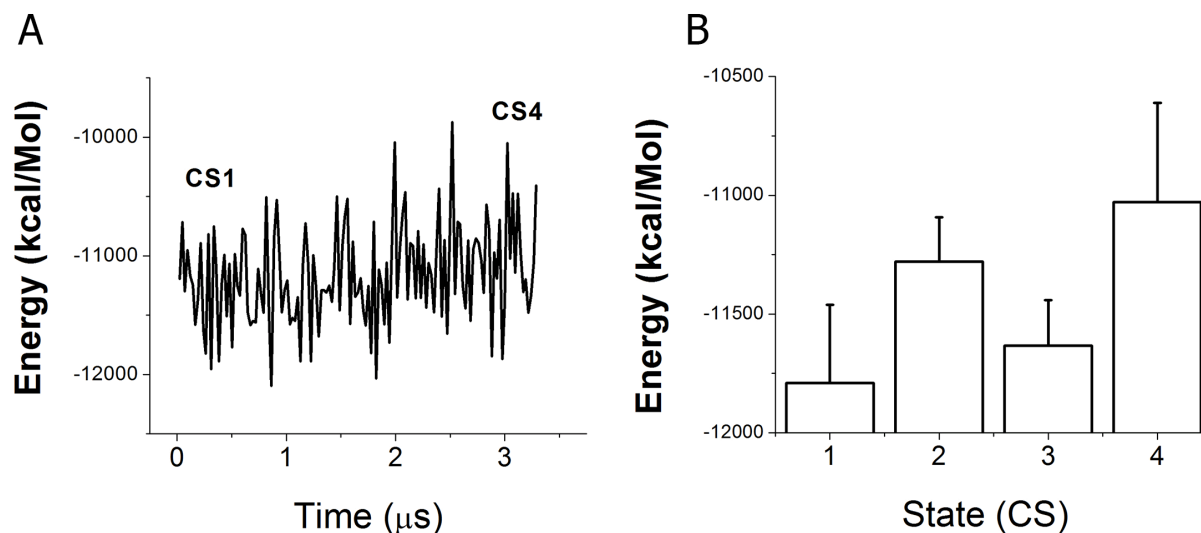

**Fig. S4.** Energies of Syt1 conformational states. The energy is computed as a sum of the energy of a protein and the energy of protein interactions with ions and water molecules. **A.** The energy along R0 trajectory (Table 1), representing a transition from the state CS1 to the state SC4. The energy was computed with a step of 100 points of the trajectory (2.4 ns). **B.** Average energies of Syt1 conformational states SC1-SC4. The bar graph shows mean  $\pm$  SD. Each data point was obtained as the average of 100 points (taken with a step of 2.4 ns) in the end of the trajectory which produced this state (R0s for SC1; R1 for SC2; R3 for SC3; R1 for SC4; see Table 1).

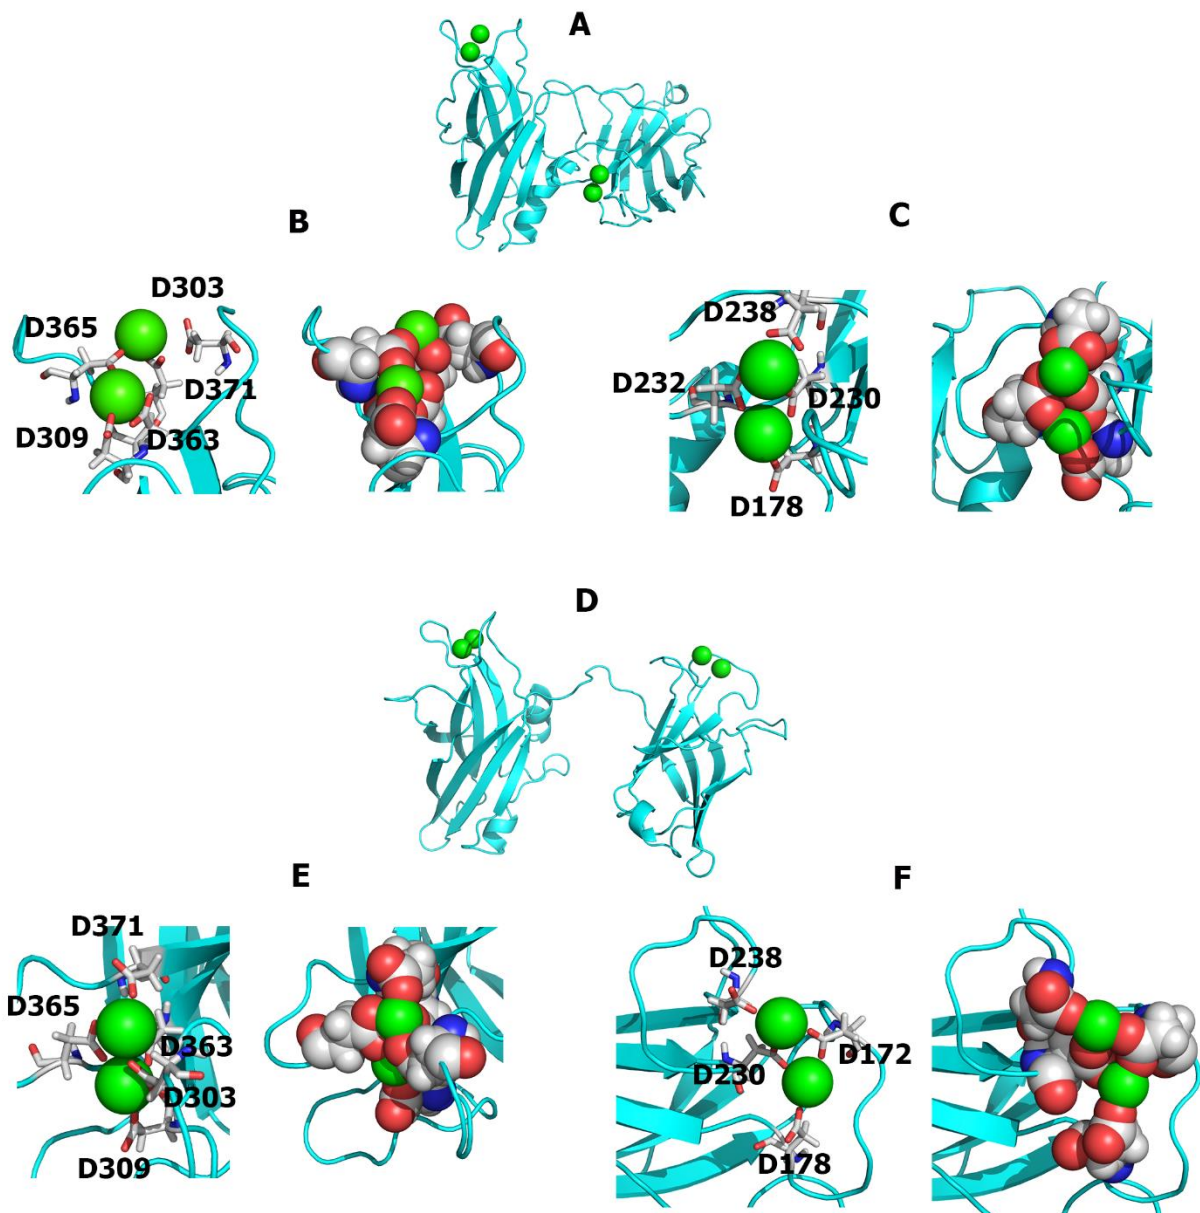

**Fig. S5.** Alternative  $\text{Ca}^{2+}$  bound forms of Syt1 obtained by MD simulations at elevated  $\text{Ca}^{2+}$  levels.  $\text{Ca}^{2+}$  ions are shown as green spheres. **A-C.**  $\text{Ca}^{2+}$  binding along the trajectory started from the state C1 (A). At C2B domain (B) two  $\text{Ca}^{2+}$  ions are chelated by aspartates D363, D365, D371, D309, and transient coordination bonds are formed with D303. At C2A domain, two  $\text{Ca}^{2+}$  ions are chelated by aspartates D178, D230, D232, and D283. **D-F.**  $\text{Ca}^{2+}$  binding along the trajectory started from a transient state with separated domains (D). At C2B domain (E) two  $\text{Ca}^{2+}$  ions are chelated by aspartates D363, D365, D371, D303, D309. At C2A domain, two  $\text{Ca}^{2+}$  ions are chelated by aspartates D172, D178, D230, and D238. In panels B, C, E, F, space filled models of  $\text{Ca}^{2+}$  ions surrounded by chelating aspartic acids are shown on the right.

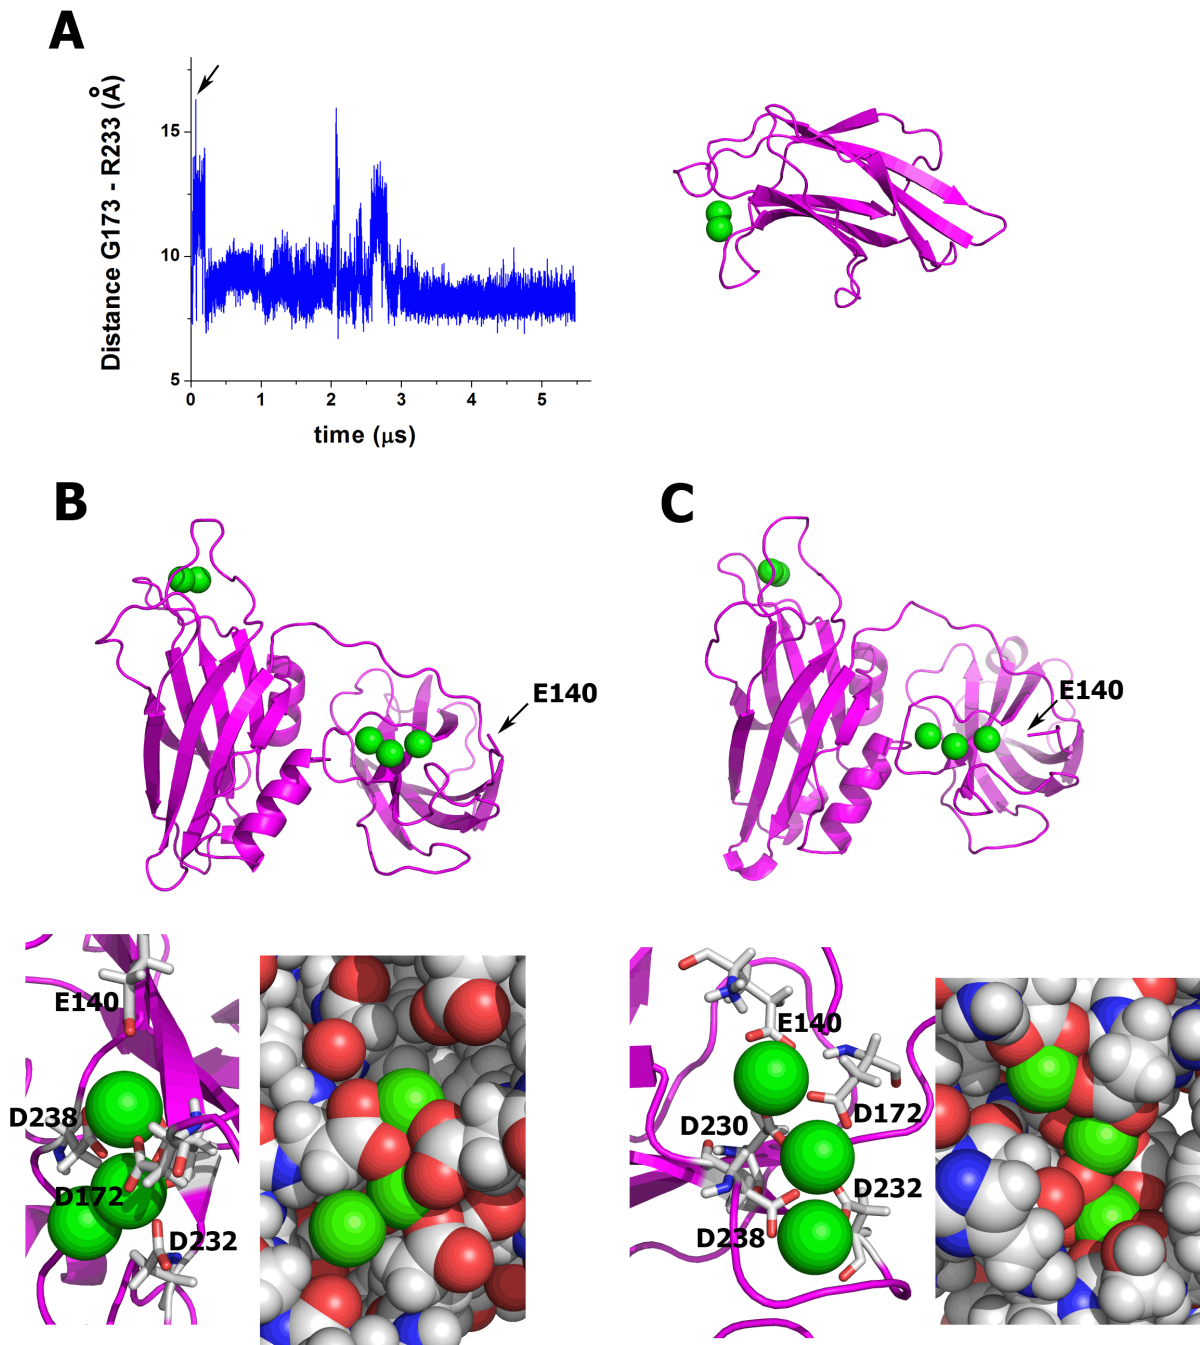

**Fig. S6.** Introducing three  $\text{Ca}^{2+}$  ions into C2A  $\text{Ca}^{2+}$  binding pocket. **A.** The distance between Ca atoms of the residues G173 and R233 along the trajectory R4Ca (Table 1) reflecting the distance between  $\text{Ca}^{2+}$  binding loops of C2A domain. Several transient increases in the distance indicate expansions of the  $\text{Ca}^{2+}$  binding pocket. The structure with the maximally opened pocket (arrow, C2A domain shown on the right) was selected to create the model of Syt1 form bound to five  $\text{Ca}^{2+}$  ions. **B.** The initial structure of the  $\text{Ca}^{2+}$ -bound Syt form. Two  $\text{Ca}^{2+}$  ions at the C2A domain are chelated by the residues D172, D232, D238, and D230 (the latter residue is shielded by  $\text{Ca}^{2+}$  ions), and the third ion occupies free space within the pocket. **C.** In the end of 250 ns simulation, two  $\text{Ca}^{2+}$  ions are chelated by the aspartates D172, D230, D232, and D238, while the third ion forms coordination bonds with the residue E140. N-terminus of Syt1 C2A-C2B fragment has moved to form contacts with C2A  $\text{Ca}^{2+}$  binding pocket.

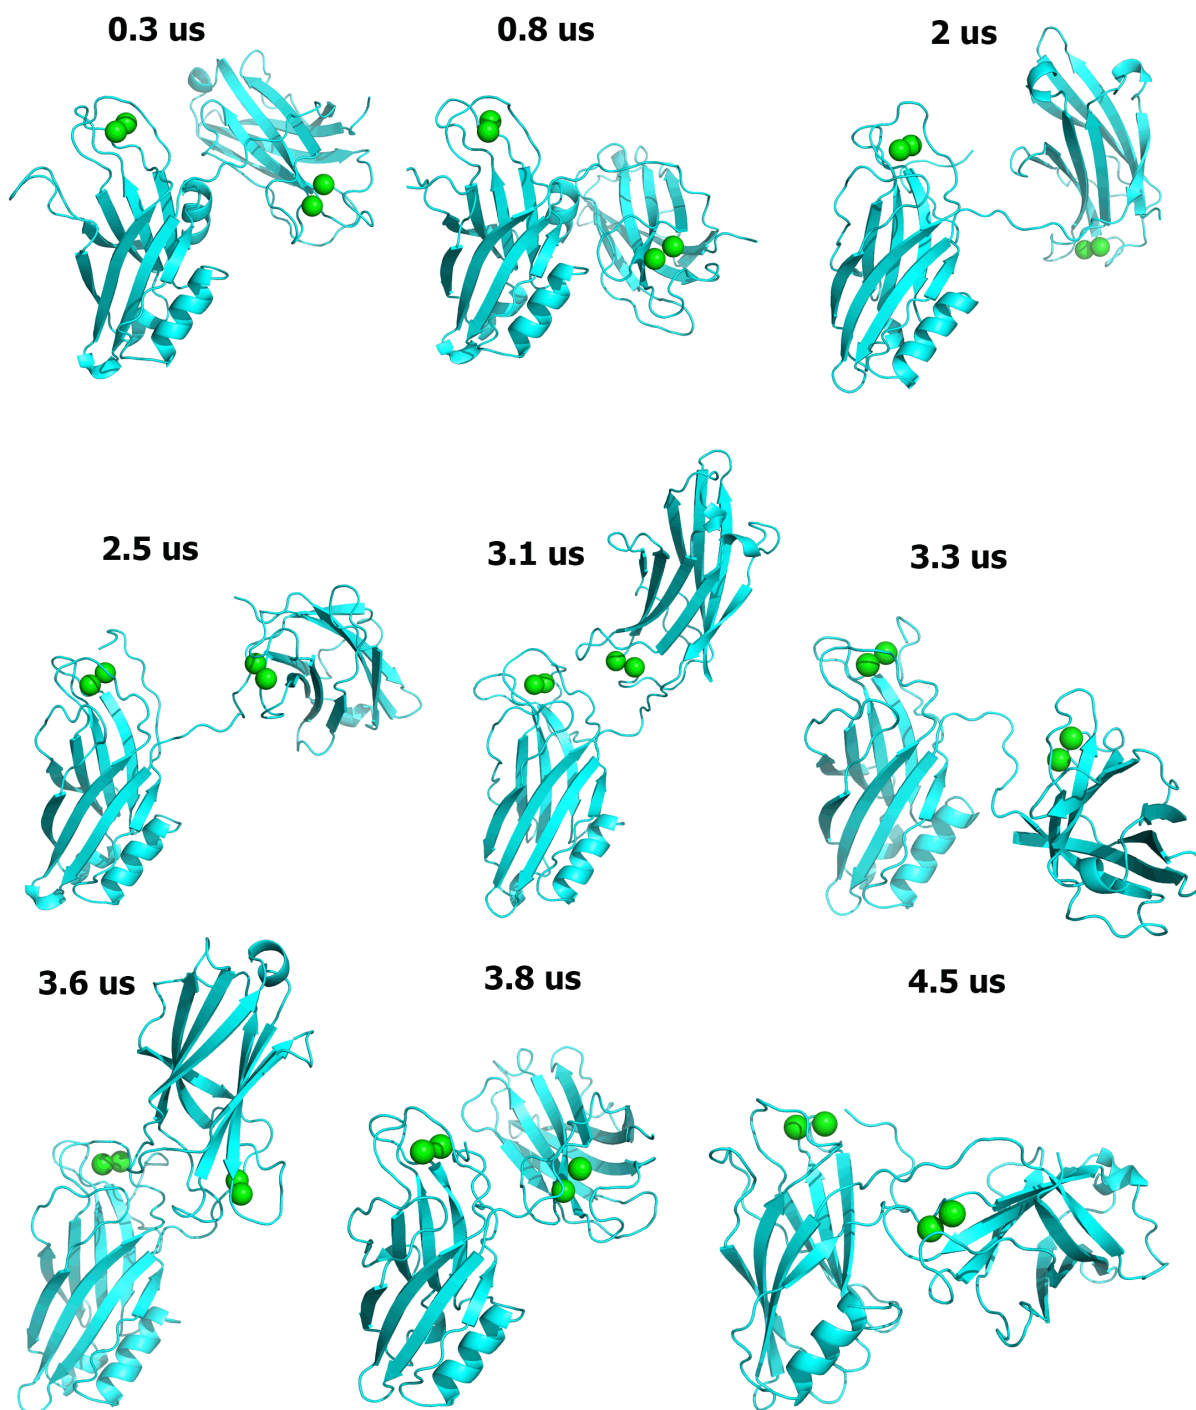

**Fig. S7.** Conformations of the  $\text{Ca}^{2+}$  bound Syt1 form along the 5.5  $\mu\text{s}$  MD trajectory (R4Ca, Table 1).  $\text{Ca}^{2+}$  ions are shown as green spheres, all the structures are shown with similar orientations of the C2B domain (left).

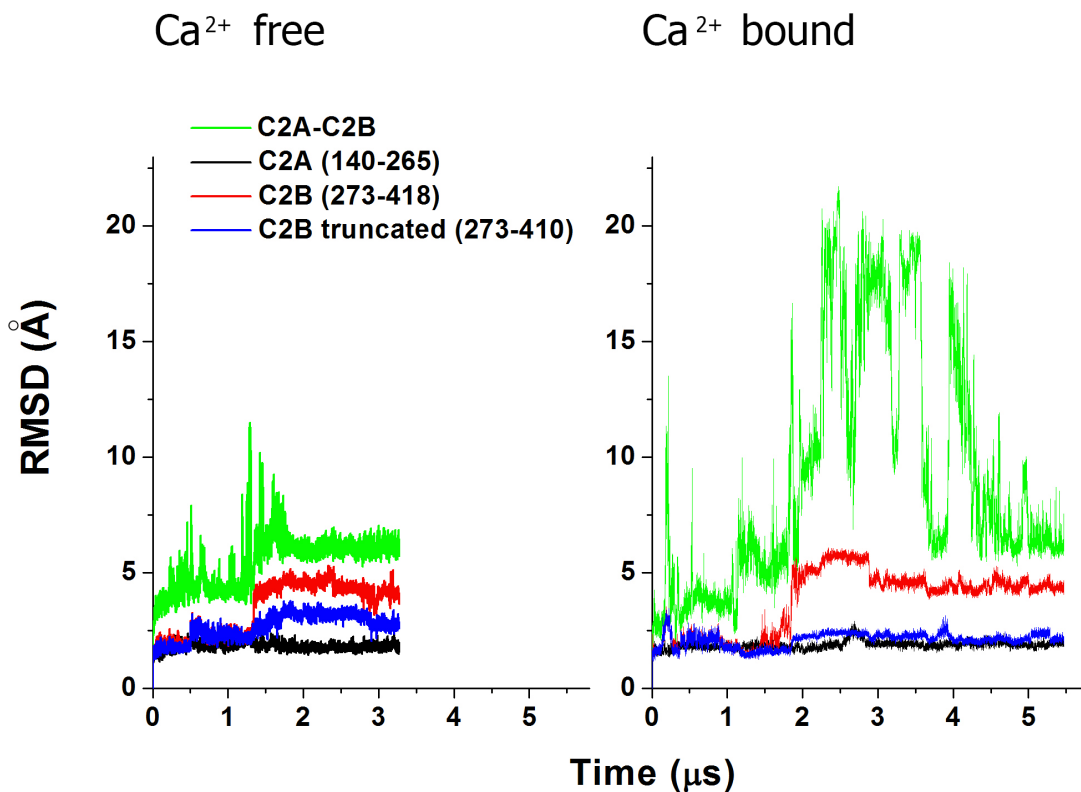

**Fig. S8.** The internal flexibility of C2 domains versus overall flexibility of C2A-C2B Syt1. RMSD was computed for backbone atoms only. RMSD for the  $\text{Ca}^{2+}$  free form of Syt was computed along the R0 trajectory (Table 1). C2A and truncated C2B domains show low flexibility, also C-terminus C2B domains is flexible in both forms (compare C2B –red, versus truncated C2B –blue). The interdomain rearrangements increase flexibility (green line), and this flexibility is significantly stronger for the  $\text{Ca}^{2+}$  - bound form.
